# Supplementary material for: Intergenomic Comparisons Highlight Modularity of the Denitrification Pathway and Underpin the Importance of Community Structure for N2O Emissions
Source: PubMed Central journal article supplement (PMC4250227; doi:10.1371/journal.pone.0114118), 2014-12-01
Supplement: pone.0114118.s006.pdf [file pone.0114118.s006.pdf]

**Table S1.** Taxon identification number and project name according to NCBI of 652 organisms harboring denitrification genes. Copy numbers of *nirK*, *nirS*, *nor* and *nosZ* are indicated.

| NCBI.TAXON.ID | NCBI.PROJECT.NAME                                   | <i>nirK</i> | <i>nirS</i> | <i>nor</i> | <i>nosZ</i> |
|---------------|-----------------------------------------------------|-------------|-------------|------------|-------------|
| 477184        | Achromobacter arsenitoxydans SY8                    | 1           | 0           | 1          | 1           |
| 762376        | Achromobacter xylosoxidans A8                       | 1           | 0           | 1          | 1           |
| 1003200       | Achromobacter xylosoxidans AXX-A                    | 1           | 0           | 1          | 1           |
| 562971        | Achromobacter xylosoxidans C54                      | 1           | 0           | 1          | 1           |
| 351607        | Acidothermus cellulolyticus 11B                     | 1           | 0           | 0          | 0           |
| 573060        | Acidovorax delafieldii 2AN                          | 0           | 1           | 2          | 1           |
| 535289        | Acidovorax ebreus TPSY                              | 0           | 1           | 2          | 1           |
| 999386        | Acidovorax radialis N35                             | 0           | 1           | 2          | 1           |
| 232721        | Acidovorax sp. JS42                                 | 0           | 1           | 2          | 1           |
| 512030        | Acidovorax sp. NO-1                                 | 0           | 0           | 1          | 1           |
| 591023        | Actinobacillus minor 202                            | 1           | 0           | 0          | 0           |
| 416269        | Actinobacillus pleuropneumoniae L20                 | 1           | 0           | 0          | 0           |
| 434271        | Actinobacillus pleuropneumoniae serovar 3 str. JL03 | 1           | 0           | 0          | 0           |
| 339671        | Actinobacillus succinogenes 130Z                    | 1           | 0           | 1          | 0           |
| 696748        | Actinobacillus suis H91-0380                        | 1           | 0           | 0          | 0           |
| 887324        | Actinobacillus ureae ATCC 25976                     | 1           | 0           | 0          | 0           |
| 525245        | Actinomyces coleocanis DSM 15436                    | 1           | 0           | 0          | 0           |
| 1125717       | Actinomyces georgiae F0490                          | 1           | 0           | 0          | 0           |
| 435830        | Actinomyces graevenitzii C83                        | 1           | 0           | 0          | 0           |
| 1125718       | Actinomyces massiliensis F0489                      | 1           | 0           | 1          | 0           |
| 1115803       | Actinomyces naeslundii 'Howell 279'                 | 1           | 0           | 1          | 0           |
| 411466        | Actinomyces odontolyticus ATCC 17982                | 1           | 0           | 0          | 0           |
| 649742        | Actinomyces odontolyticus F0309                     | 1           | 0           | 0          | 0           |
| 871541        | Actinomyces oris K20                                | 1           | 0           | 1          | 0           |
| 521393        | Actinomyces sp. 7400942                             | 1           | 0           | 1          | 0           |
| 762963        | Actinomyces sp. oral taxon 170 str. F0386           | 1           | 0           | 1          | 0           |
| 706439        | Actinomyces sp. oral taxon 171 str. F0337           | 1           | 0           | 1          | 0           |
| 944560        | Actinomyces sp. oral taxon 175 str. F0384           | 1           | 0           | 1          | 0           |
| 888051        | Actinomyces sp. oral taxon 178 str. F0338           | 1           | 0           | 0          | 0           |
| 888052        | Actinomyces sp. oral taxon 180 str. F0310           | 1           | 0           | 0          | 0           |
| 888056        | Actinomyces sp. oral taxon 448 str. F0400           | 1           | 0           | 1          | 0           |
| 649743        | Actinomyces sp. oral taxon 848 str. F0332           | 1           | 0           | 0          | 0           |
| 653386        | Actinomyces sp. oral taxon 849 str. F0330           | 1           | 0           | 1          | 0           |
| 1118058       | Actinomyces sp. ph3                                 | 1           | 0           | 0          | 0           |
| 1105029       | Actinomyces sp. str. ICM39                          | 1           | 0           | 0          | 0           |
| 936548        | Actinomyces sp. str. ICM47                          | 1           | 0           | 0          | 0           |
| 525246        | Actinomyces urogenitalis DSM 15434                  | 1           | 0           | 0          | 0           |
| 562973        | Actinomyces viscosus C505                           | 1           | 0           | 1          | 0           |
| 512565        | Actinoplanes missouriensis NBRC 102363              | 1           | 0           | 0          | 0           |
| 446462        | Actinosynnema mirum DSM 43827                       | 1           | 0           | 0          | 0           |
| 746697        | Aequorivita sublithicola DSM 14238                  | 1           | 0           | 0          | 1           |

|                |                                                              |   |   |   |   |
|----------------|--------------------------------------------------------------|---|---|---|---|
| <b>1208104</b> | <i>Aeromonas media</i> WS                                    | 0 | 0 | 0 | 1 |
| <b>1197906</b> | <i>Afipia birgiae</i> 34632                                  | 0 | 0 | 0 | 1 |
| <b>883080</b>  | <i>Afipia felis</i> ATCC 53690                               | 1 | 0 | 0 | 0 |
| <b>666684</b>  | <i>Afipia</i> sp. 1NLS2                                      | 3 | 0 | 1 | 1 |
| <b>176299</b>  | <i>Agrobacterium tumefaciens</i> str. C58                    | 1 | 0 | 1 | 0 |
| <b>447093</b>  | <i>Ajellomyces capsulatus</i> G186AR                         | 1 | 0 | 1 | 0 |
| <b>946394</b>  | <i>Ajellomyces dermatitidis</i> ATCC 18187                   | 1 | 0 | 1 | 0 |
| <b>1156919</b> | <i>Alcaligenes faecalis</i> Aunclassified                    | 1 | 0 | 1 | 0 |
| <b>1156918</b> | <i>Alcaligenes faecalis</i> subsp. <i>faecalis</i> NCIB 8687 | 1 | 0 | 1 | 1 |
| <b>1069631</b> | <i>Alcaligenes</i> sp. HPC1271                               | 1 | 0 | 1 | 1 |
| <b>930169</b>  | <i>Alcanivorax dieselolei</i> B5                             | 1 | 0 | 1 | 1 |
| <b>596153</b>  | <i>Alicyclophilus denitrificans</i> BC                       | 0 | 1 | 1 | 1 |
| <b>596154</b>  | <i>Alicyclophilus denitrificans</i> K601                     | 0 | 1 | 1 | 1 |
| <b>1200791</b> | <i>Alicyclophilus</i> sp. CRZ1                               | 1 | 1 | 2 | 0 |
| <b>1200346</b> | <i>Alicyclobacillus hesperidum</i> URH17-3-68                | 1 | 0 | 0 | 0 |
| <b>187272</b>  | <i>Alkalilimnicola ehrlichei</i> MLHE-1                      | 0 | 0 | 1 | 1 |
| <b>926569</b>  | <i>Anaerolinea thermophila</i> UNI-1                         | 0 | 1 | 0 | 0 |
| <b>455488</b>  | <i>Anaeromyxobacter dehalogenans</i> 2CP-1                   | 0 | 0 | 2 | 1 |
| <b>290397</b>  | <i>Anaeromyxobacter dehalogenans</i> 2CP-C                   | 0 | 0 | 3 | 1 |
| <b>404589</b>  | <i>Anaeromyxobacter</i> sp. Fw109-5                          | 0 | 0 | 3 | 1 |
| <b>447217</b>  | <i>Anaeromyxobacter</i> sp. K                                | 0 | 0 | 3 | 1 |
| <b>76114</b>   | <i>Aromatoleum aromaticum</i> EbN1                           | 0 | 1 | 1 | 1 |
| <b>861360</b>  | <i>Arthrobacter arilaitensis</i> Re117 RE117                 | 1 | 0 | 0 | 0 |
| <b>663331</b>  | <i>Arthroderma benhamiae</i> CBS 112371                      | 1 | 0 | 1 | 0 |
| <b>535722</b>  | <i>Arthroderma gypseum</i> CBS 118893                        | 1 | 0 | 1 | 0 |
| <b>554155</b>  | <i>Arthroderma otae</i> CBS 113480                           | 1 | 0 | 0 | 0 |
| <b>332952</b>  | <i>Aspergillus flavus</i> NRRL3357                           | 1 | 0 | 1 | 0 |
| <b>330879</b>  | <i>Aspergillus fumigatus</i> Af293                           | 2 | 0 | 0 | 0 |
| <b>510516</b>  | <i>Aspergillus oryzae</i> RIB40                              | 1 | 0 | 1 | 0 |
| <b>927772</b>  | <i>Aspergillus sojae</i> NBRC 4239                           | 1 | 0 | 1 | 0 |
| <b>341663</b>  | <i>Aspergillus terreus</i> NIH2624                           | 1 | 0 | 1 | 0 |
| <b>1105030</b> | <i>Atopobium</i> sp. ICM58                                   | 1 | 0 | 0 | 0 |
| <b>1184607</b> | <i>Austwickia chelonae</i> NBRC 105200                       | 1 | 0 | 1 | 0 |
| <b>1001584</b> | <i>Avibacterium paragallinarum</i> AVPAR72                   | 1 | 0 | 0 | 0 |
| <b>62928</b>   | <i>Azoarcus</i> sp. BH72                                     | 0 | 0 | 1 | 1 |
| <b>1003237</b> | <i>Azospirillum amazonense</i> Y2                            | 0 | 0 | 0 | 1 |
| <b>1064539</b> | <i>Azospirillum brasilense</i>                               | 1 | 0 | 1 | 1 |
| <b>862719</b>  | <i>Azospirillum lipoferum</i> 4B                             | 1 | 0 | 1 | 1 |
| <b>137722</b>  | <i>Azospirillum</i> sp. B510                                 | 1 | 0 | 1 | 0 |
| <b>1131731</b> | <i>Bacillus azotoformans</i> LMG 9581                        | 1 | 0 | 2 | 3 |
| <b>1196031</b> | <i>Bacillus oceanisediminis</i> 2691                         | 1 | 0 | 0 | 0 |
| <b>1033734</b> | <i>Bacillus</i> sp. 10403023                                 | 1 | 0 | 0 | 0 |
| <b>665959</b>  | <i>Bacillus</i> sp. 2_A_57_CT2                               | 1 | 0 | 0 | 0 |
| <b>660997</b>  | <i>Bacillus</i> sp. JC63                                     | 0 | 0 | 0 | 1 |
| <b>264462</b>  | <i>Bdellovibrio bacteriovorus</i> HD100                      | 1 | 0 | 1 | 0 |
| <b>1069642</b> | <i>Bdellovibrio bacteriovorus</i> str. Tiberius              | 1 | 0 | 1 | 0 |

|                |                                                |   |   |   |   |
|----------------|------------------------------------------------|---|---|---|---|
| <b>232259</b>  | <i>Belliella baltica</i> DSM 15883             | 1 | 0 | 0 | 1 |
| <b>1147128</b> | <i>Bifidobacterium asteroides</i> PRL2011      | 1 | 0 | 0 | 0 |
| <b>1046627</b> | <i>Bizionia argentinensis</i> JUB59            | 1 | 0 | 1 | 1 |
| <b>138336</b>  | <i>Blastococcus saxosidens</i> DD2             | 1 | 0 | 0 | 0 |
| <b>340100</b>  | <i>Bordetella petrii</i> DSM 12804             | 0 | 1 | 2 | 1 |
| <b>446465</b>  | <i>Brachybacterium faecium</i> DSM 4810        | 1 | 0 | 1 | 0 |
| <b>1064537</b> | <i>Brachybacterium paraconglomeratum</i> LC44  | 1 | 0 | 0 | 0 |
| <b>1074488</b> | <i>Brachybacterium squillarum</i> M-6-3        | 1 | 0 | 0 | 0 |
| <b>1128253</b> | <i>Bradyrhizobium japonicum</i> CCBAU 15354    | 1 | 0 | 1 | 0 |
| <b>1128255</b> | <i>Bradyrhizobium japonicum</i> CCBAU 15618    | 1 | 0 | 1 | 0 |
| <b>224911</b>  | <i>Bradyrhizobium japonicum</i> USDA 110       | 1 | 0 | 1 | 1 |
| <b>1037409</b> | <i>Bradyrhizobium japonicum</i> USDA 6         | 1 | 0 | 2 | 0 |
| <b>1128287</b> | <i>Bradyrhizobium liaoningense</i> CCBAU 05525 | 1 | 0 | 0 | 0 |
| <b>288000</b>  | <i>Bradyrhizobium</i> sp. BTAi1                | 1 | 0 | 1 | 1 |
| <b>1128179</b> | <i>Bradyrhizobium</i> sp. CCBAU 15615          | 1 | 0 | 1 | 1 |
| <b>1128180</b> | <i>Bradyrhizobium</i> sp. CCBAU 15635          | 1 | 0 | 1 | 1 |
| <b>1128178</b> | <i>Bradyrhizobium</i> sp. CCBAU 43298          | 1 | 0 | 1 | 1 |
| <b>1223566</b> | <i>Bradyrhizobium</i> sp. CCGE-LA001           | 1 | 0 | 1 | 0 |
| <b>566679</b>  | <i>Bradyrhizobium</i> sp. ORS 375              | 2 | 0 | 1 | 1 |
| <b>114615</b>  | <i>Bradyrhizobium</i> sp. ORS278               | 1 | 0 | 1 | 0 |
| <b>115808</b>  | <i>Bradyrhizobium</i> sp. ORS285               | 1 | 0 | 1 | 1 |
| <b>335659</b>  | <i>Bradyrhizobium</i> sp. S23321               | 1 | 0 | 1 | 0 |
| <b>551936</b>  | <i>Bradyrhizobium</i> sp. STM 3809             | 1 | 0 | 1 | 1 |
| <b>551947</b>  | <i>Bradyrhizobium</i> sp. STM 3843             | 1 | 0 | 1 | 1 |
| <b>319003</b>  | <i>Bradyrhizobium</i> sp. WSM1253              | 1 | 0 | 1 | 0 |
| <b>319017</b>  | <i>Bradyrhizobium</i> sp. WSM471               | 1 | 0 | 1 | 0 |
| <b>1144344</b> | <i>Bradyrhizobium</i> sp. YR681                | 1 | 0 | 0 | 0 |
| <b>1128326</b> | <i>Bradyrhizobium yuanmingense</i> CCBAU 05623 | 1 | 0 | 1 | 1 |
| <b>1128327</b> | <i>Bradyrhizobium yuanmingense</i> CCBAU 25021 | 1 | 0 | 1 | 0 |
| <b>391600</b>  | <i>Brevundimonas</i> sp. BAL3                  | 1 | 0 | 0 | 0 |
| <b>1104320</b> | <i>Brucella abortus</i> A13334                 | 1 | 0 | 1 | 1 |
| <b>483179</b>  | <i>Brucella canis</i> ATCC 23365               | 1 | 0 | 1 | 1 |
| <b>595497</b>  | <i>Brucella ceti</i> str. Cudo                 | 1 | 0 | 1 | 1 |
| <b>1148757</b> | <i>Brucella melitensis</i> S66                 | 1 | 0 | 1 | 1 |
| <b>568815</b>  | <i>Brucella microti</i> CCM 4915               | 1 | 0 | 1 | 1 |
| <b>520456</b>  | <i>Brucella neotomae</i> 5K33                  | 0 | 0 | 1 | 1 |
| <b>444178</b>  | <i>Brucella ovis</i> ATCC 25840                | 1 | 0 | 1 | 1 |
| <b>520461</b>  | <i>Brucella pinnipedialis</i> B2/94            | 1 | 0 | 1 | 1 |
| <b>520449</b>  | <i>Brucella</i> sp. 83/13                      | 1 | 0 | 1 | 1 |
| <b>470735</b>  | <i>Brucella</i> sp. BO1                        | 1 | 0 | 1 | 1 |
| <b>204722</b>  | <i>Brucella suis</i> 1330                      | 1 | 0 | 1 | 1 |
| <b>520488</b>  | <i>Brucella suis</i> bv. 4 str. 40             | 1 | 0 | 1 | 1 |
| <b>243160</b>  | <i>Burkholderia mallei</i> ATCC 23344          | 2 | 0 | 2 | 1 |
| <b>412022</b>  | <i>Burkholderia mallei</i> NCTC 10229          | 2 | 0 | 2 | 0 |
| <b>441162</b>  | <i>Burkholderia oklahomensis</i> C6786         | 1 | 0 | 1 | 0 |
| <b>441163</b>  | <i>Burkholderia oklahomensis</i> EO147         | 1 | 0 | 1 | 0 |

|                |                                                                     |   |   |   |   |
|----------------|---------------------------------------------------------------------|---|---|---|---|
| <b>884204</b>  | <i>Burkholderia pseudomallei</i> 1026b                              | 2 | 0 | 2 | 1 |
| <b>1086032</b> | <i>Burkholderia pseudomallei</i> 1258a                              | 1 | 0 | 1 | 1 |
| <b>441155</b>  | <i>Burkholderia pseudomallei</i> B7210                              | 2 | 0 | 2 | 1 |
| <b>271848</b>  | <i>Burkholderia thailandensis</i> E264                              | 2 | 0 | 2 | 1 |
| <b>441157</b>  | <i>Burkholderia thailandensis</i> MSMB43                            | 1 | 0 | 1 | 0 |
| <b>864051</b>  | Burkholderiales bacterium JOSHI_001                                 | 0 | 1 | 1 | 0 |
| <b>986075</b>  | <i>Caldalkalibacillus thermarum</i> TA2.A1                          | 1 | 0 | 0 | 0 |
| <b>926550</b>  | <i>Caldilinea aerophila</i> DSM 14535 = NBRC 104270                 | 0 | 0 | 0 | 1 |
| <b>360104</b>  | <i>Campylobacter concisus</i> 13826                                 | 0 | 0 | 1 | 1 |
| <b>360105</b>  | <i>Campylobacter curvus</i> 525.92                                  | 0 | 0 | 1 | 1 |
| <b>360106</b>  | <i>Campylobacter fetus</i> subsp. <i>fetus</i> 82-40                | 0 | 0 | 0 | 1 |
| <b>983328</b>  | <i>Campylobacter fetus</i> subsp. <i>venerealis</i> str. NCTC 10354 | 0 | 0 | 0 | 1 |
| <b>553220</b>  | <i>Campylobacter gracilis</i> RM3268                                | 0 | 0 | 1 | 1 |
| <b>553218</b>  | <i>Campylobacter rectus</i> RM3267                                  | 0 | 0 | 0 | 1 |
| <b>1244083</b> | <i>Campylobacter showae</i> CSUNSWCD                                | 0 | 0 | 1 | 1 |
| <b>553219</b>  | <i>Campylobacter showae</i> RM3277                                  | 0 | 0 | 1 | 1 |
| <b>665939</b>  | <i>Campylobacter</i> sp. 10_1_50                                    | 0 | 0 | 1 | 1 |
| <b>522306</b>  | Candidatus <i>Accumulibacter phosphatis</i> clade IIA str. UW-1     | 0 | 1 | 1 | 1 |
| <b>671143</b>  | Candidatus <i>Methylomirabilis oxyfera</i>                          | 0 | 1 | 3 | 0 |
| <b>1231054</b> | Candidatus <i>Microthrix parvicella</i> Bio17-1                     | 1 | 0 | 0 | 0 |
| <b>886738</b>  | Candidatus <i>Nitrosoarchaeum limnia</i> SFB1                       | 1 | 0 | 0 | 0 |
| <b>1229908</b> | Candidatus <i>Nitrosopumilus koreensis</i> AR1                      | 1 | 0 | 0 | 0 |
| <b>1229909</b> | Candidatus <i>Nitrosopumilus</i> sp. AR2                            | 1 | 0 | 0 | 0 |
| <b>859192</b>  | Candidatus <i>Nitrosopumilus</i> sp. BG20                           | 1 | 0 | 0 | 0 |
| <b>497727</b>  | Candidatus <i>Nitrososphaera gargensis</i> Ga9.2                    | 2 | 0 | 0 | 0 |
| <b>330214</b>  | Candidatus <i>Nitrospira defluvii</i>                               | 2 | 0 | 0 | 0 |
| <b>553178</b>  | <i>Capnocytophaga gingivalis</i> ATCC 33624                         | 1 | 0 | 0 | 1 |
| <b>936370</b>  | <i>Capnocytophaga</i> sp. CM59                                      | 1 | 0 | 1 | 1 |
| <b>706436</b>  | <i>Capnocytophaga</i> sp. oral taxon 329 str. F0087                 | 1 | 0 | 1 | 0 |
| <b>888059</b>  | <i>Capnocytophaga</i> sp. oral taxon 338 str. F0234                 | 1 | 0 | 0 | 1 |
| <b>553177</b>  | <i>Capnocytophaga sputigena</i> ATCC 33612                          | 1 | 0 | 1 | 0 |
| <b>638300</b>  | <i>Cardiobacterium hominis</i> ATCC 15826                           | 1 | 0 | 1 | 1 |
| <b>797473</b>  | <i>Cardiobacterium valvarum</i> F0432                               | 1 | 0 | 1 | 1 |
| <b>509190</b>  | <i>Caulobacter segnis</i> ATCC 21756                                | 1 | 0 | 1 | 0 |
| <b>1225176</b> | <i>Cecembia lonarensis</i> LW9                                      | 1 | 0 | 2 | 1 |
| <b>1208323</b> | <i>Celeribacter baekdonensis</i> B30                                | 1 | 0 | 1 | 1 |
| <b>590998</b>  | <i>Cellulomonas fimi</i> ATCC 484                                   | 1 | 0 | 0 | 0 |
| <b>446466</b>  | <i>Cellulomonas flavigena</i> DSM 20109                             | 1 | 0 | 0 | 0 |
| <b>688270</b>  | <i>Cellulophaga algicola</i> DSM 14237                              | 0 | 0 | 1 | 1 |
| <b>593907</b>  | <i>Cellvibrio gilvus</i> ATCC 13127                                 | 1 | 0 | 0 | 0 |
| <b>306901</b>  | <i>Chaetomium globosum</i> CBS 148.51                               | 1 | 0 | 1 | 0 |
| <b>759272</b>  | <i>Chaetomium thermophilum</i> var. <i>thermophilum</i> DSM 1495    | 1 | 0 | 1 | 0 |
| <b>1211115</b> | <i>Chelatococcus</i> sp. GW1                                        | 1 | 0 | 1 | 1 |
| <b>326427</b>  | <i>Chloroflexus aggregans</i> DSM 9485                              | 1 | 0 | 0 | 0 |
| <b>324602</b>  | <i>Chloroflexus aurantiacus</i> J-10-fl                             | 1 | 0 | 0 | 0 |
| <b>480224</b>  | <i>Chloroflexus</i> sp. Y-400-fl                                    | 1 | 0 | 0 | 0 |

|                |                                                         |   |   |   |   |
|----------------|---------------------------------------------------------|---|---|---|---|
| <b>243365</b>  | <i>Chromobacterium violaceum</i> ATCC 12472             | 1 | 0 | 1 | 0 |
| <b>525257</b>  | <i>Chryseobacterium gleum</i> ATCC 35910                | 1 | 0 | 1 | 0 |
| <b>497964</b>  | <i>Chthoniobacter flavus</i> Ellin428                   | 1 | 0 | 0 | 0 |
| <b>766499</b>  | <i>Citricella</i> sp. 357                               | 0 | 0 | 0 | 1 |
| <b>396776</b>  | <i>Coccidioides immitis</i> H538.4                      | 1 | 0 | 0 | 0 |
| <b>469472</b>  | <i>Coccidioides posadasii</i> CPA 0001                  | 1 | 0 | 0 | 0 |
| <b>490068</b>  | <i>Coccidioides posadasii</i> CPA 0020                  | 1 | 0 | 0 | 0 |
| <b>490066</b>  | <i>Coccidioides posadasii</i> RMSCC 1038                | 1 | 0 | 0 | 0 |
| <b>443226</b>  | <i>Coccidioides posadasii</i> str. Silveira             | 1 | 0 | 0 | 0 |
| <b>167879</b>  | <i>Colwellia psychrerythraea</i> 34H                    | 0 | 1 | 1 | 1 |
| <b>525260</b>  | <i>Corynebacterium accolens</i> ATCC 49725              | 1 | 0 | 1 | 0 |
| <b>548476</b>  | <i>Corynebacterium aurimucosum</i> ATCC 700975          | 1 | 0 | 0 | 0 |
| <b>698966</b>  | <i>Corynebacterium diphtheriae</i> 241                  | 1 | 0 | 1 | 0 |
| <b>196164</b>  | <i>Corynebacterium efficiens</i> YS-314                 | 1 | 0 | 0 | 0 |
| <b>645127</b>  | <i>Corynebacterium kroppenstedtii</i> DSM 44385         | 1 | 0 | 0 | 0 |
| <b>525264</b>  | <i>Corynebacterium pseudogenitalium</i> ATCC 33035      | 1 | 0 | 0 | 0 |
| <b>1074485</b> | <i>Corynebacterium pseudotuberculosis</i> 316           | 1 | 0 | 1 | 0 |
| <b>1087453</b> | <i>Corynebacterium pseudotuberculosis</i> 42/02-A       | 1 | 0 | 1 | 0 |
| <b>525268</b>  | <i>Corynebacterium striatum</i> ATCC 6940               | 1 | 0 | 0 | 0 |
| <b>553206</b>  | <i>Corynebacterium tuberculostearicum</i> SK141         | 1 | 0 | 0 | 0 |
| <b>504474</b>  | <i>Corynebacterium urealyticum</i> DSM 7109             | 1 | 0 | 0 | 0 |
| <b>1200775</b> | <i>Cupriavidus basilensis</i> B-8                       | 0 | 1 | 1 | 1 |
| <b>1217718</b> | <i>Cupriavidus</i> sp. BIS7                             | 0 | 2 | 1 | 0 |
| <b>164546</b>  | <i>Cupriavidus taiwanensis</i>                          | 0 | 1 | 0 | 0 |
| <b>159087</b>  | <i>Dechloromonas aromatica</i> RCB                      | 0 | 2 | 1 | 2 |
| <b>640081</b>  | <i>Dechlorosoma suillum</i> PS                          | 0 | 2 | 1 | 2 |
| <b>522772</b>  | <i>Denitrovibrio acetiphilus</i> DSM 12809              | 0 | 0 | 0 | 1 |
| <b>756499</b>  | <i>Desulfitobacterium dehalogenans</i> ATCC 51507       | 0 | 0 | 1 | 1 |
| <b>871963</b>  | <i>Desulfitobacterium dichloroeliminans</i> LMG P-21439 | 0 | 0 | 1 | 1 |
| <b>537010</b>  | <i>Desulfitobacterium hafniense</i> DP7                 | 0 | 0 | 1 | 1 |
| <b>138119</b>  | <i>Desulfitobacterium hafniense</i> Y51                 | 0 | 0 | 1 | 1 |
| <b>706587</b>  | <i>Desulfomonile tiedjei</i> DSM 6799                   | 0 | 0 | 1 | 1 |
| <b>768704</b>  | <i>Desulfosporosinus meridiei</i> DSM 13257             | 0 | 0 | 1 | 1 |
| <b>768710</b>  | <i>Desulfosporosinus youngiae</i> DSM 17734             | 0 | 0 | 1 | 1 |
| <b>696281</b>  | <i>Desulfotomaculum ruminis</i> DSM 2154                | 0 | 0 | 0 | 1 |
| <b>1077144</b> | <i>Dietzia alimentaria</i> 72                           | 1 | 0 | 0 | 0 |
| <b>910954</b>  | <i>Dietzia cinnamea</i> P4                              | 1 | 0 | 0 | 0 |
| <b>398580</b>  | <i>Dinoroseobacter shibae</i> DFL 12                    | 0 | 1 | 1 | 1 |
| <b>471854</b>  | <i>Dyadobacter fermentans</i> DSM 18053                 | 0 | 0 | 0 | 1 |
| <b>1217721</b> | <i>Dyella japonica</i> A8                               | 1 | 0 | 0 | 0 |
| <b>1049564</b> | endosymbiont of <i>Tevnia jerichonana</i>               | 0 | 1 | 1 | 1 |
| <b>589924</b>  | <i>Ferroglobus placidus</i> DSM 10642                   | 0 | 0 | 1 | 1 |
| <b>531844</b>  | Flavobacteriaceae bacterium 3519-10                     | 1 | 0 | 0 | 1 |
| <b>1178825</b> | Flavobacteriaceae bacterium P7-3-5                      | 0 | 0 | 0 | 1 |
| <b>391603</b>  | Flavobacteriales bacterium ALC-1                        | 0 | 0 | 0 | 1 |
| <b>1041826</b> | <i>Flavobacterium columnare</i> ATCC 49512              | 1 | 0 | 1 | 1 |

|                |                                                                    |   |   |   |   |
|----------------|--------------------------------------------------------------------|---|---|---|---|
| <b>376686</b>  | <i>Flavobacterium johnsoniae</i> UW101                             | 1 | 0 | 1 | 0 |
| <b>1144313</b> | <i>Flavobacterium</i> sp. CF136                                    | 1 | 0 | 1 | 0 |
| <b>1202532</b> | <i>Flavobacterium</i> sp. F52                                      | 1 | 0 | 1 | 1 |
| <b>643867</b>  | <i>Flexibacter tractuosus</i> DSM 4126                             | 1 | 0 | 1 | 1 |
| <b>1215603</b> | <i>Fusarium fujikuroi</i> B14                                      | 1 | 0 | 1 | 0 |
| <b>426428</b>  | <i>Fusarium oxysporum</i> f. sp. <i>lycopersici</i> 4286 FGSC 4286 | 1 | 0 | 2 | 0 |
| <b>555500</b>  | <i>Galbibacter</i> sp. ck-I2-15                                    | 1 | 0 | 1 | 0 |
| <b>1005058</b> | <i>Gallibacterium anatis</i> UMN179                                | 1 | 0 | 1 | 0 |
| <b>83406</b>   | gamma proteobacterium HdN1                                         | 1 | 1 | 4 | 1 |
| <b>379066</b>  | <i>Gemmatimonas aurantiaca</i> T-27                                | 1 | 0 | 0 | 1 |
| <b>1234664</b> | <i>Geobacillus caldoxylosilyticus</i> CIC9                         | 1 | 0 | 1 | 1 |
| <b>235909</b>  | <i>Geobacillus kaustophilus</i> HTA426                             | 1 | 0 | 1 | 0 |
| <b>495036</b>  | <i>Geobacillus</i> sp. G11MC16                                     | 1 | 0 | 1 | 1 |
| <b>581103</b>  | <i>Geobacillus</i> sp. Y4.1MC1                                     | 1 | 0 | 1 | 0 |
| <b>420246</b>  | <i>Geobacillus thermodenitrificans</i> NG80-2                      | 1 | 0 | 1 | 1 |
| <b>634956</b>  | <i>Geobacillus thermoglucosidasius</i> C56-YS93                    | 1 | 0 | 1 | 0 |
| <b>1136178</b> | <i>Geobacillus thermoglucosidasius</i> GT20                        | 1 | 0 | 1 | 0 |
| <b>334819</b>  | <i>Gibberella moniliformis</i> 7600                                | 1 | 0 | 2 | 0 |
| <b>865937</b>  | <i>Gillisia limnaea</i> DSM 15749                                  | 1 | 0 | 0 | 1 |
| <b>493475</b>  | <i>Glaciecola arctica</i> BSs20135                                 | 1 | 0 | 1 | 0 |
| <b>411154</b>  | <i>Gramella forsetii</i> KT0803                                    | 0 | 0 | 0 | 1 |
| <b>1095744</b> | <i>Haemophilus parahaemolyticus</i> HK385                          | 1 | 0 | 0 | 0 |
| <b>888828</b>  | <i>Haemophilus parainfluenzae</i> ATCC 33392                       | 1 | 0 | 1 | 0 |
| <b>1095746</b> | <i>Haemophilus parainfluenzae</i> HK2019                           | 1 | 0 | 1 | 0 |
| <b>1095745</b> | <i>Haemophilus parainfluenzae</i> HK262                            | 1 | 0 | 1 | 0 |
| <b>862965</b>  | <i>Haemophilus parainfluenzae</i> T3T1                             | 1 | 0 | 1 | 0 |
| <b>1095743</b> | <i>Haemophilus paraphrohaemolyticus</i> HK411                      | 1 | 0 | 0 | 0 |
| <b>128398</b>  | <i>Haemophilus pittmaniae</i> HK 85                                | 1 | 0 | 0 | 0 |
| <b>349521</b>  | <i>Hahella chejuensis</i> KCTC 2396                                | 0 | 1 | 2 | 1 |
| <b>760192</b>  | <i>Haliscomenobacter hydrossis</i> DSM 1100                        | 0 | 0 | 1 | 1 |
| <b>634497</b>  | <i>Haloarcula hispanica</i> ATCC 33960                             | 1 | 0 | 1 | 1 |
| <b>272569</b>  | <i>Haloarcula marismortui</i> ATCC 43049                           | 1 | 0 | 1 | 1 |
| <b>751944</b>  | <i>Halobacterium</i> sp. DL1                                       | 0 | 0 | 0 | 1 |
| <b>523841</b>  | <i>Haloferax mediterranei</i> ATCC 33500                           | 0 | 0 | 1 | 1 |
| <b>309800</b>  | <i>Haloferax volcanii</i> DS2                                      | 1 | 0 | 1 | 0 |
| <b>469382</b>  | <i>Halogeometricum borinquense</i> DSM 11551                       | 1 | 0 | 1 | 1 |
| <b>485914</b>  | <i>Halomicrobium mukohataei</i> DSM 12286                          | 1 | 0 | 1 | 0 |
| <b>590061</b>  | <i>Halomonas</i> sp. KM-1                                          | 0 | 1 | 1 | 1 |
| <b>756883</b>  | halophilic archaeon DL31                                           | 0 | 0 | 0 | 1 |
| <b>797210</b>  | <i>Halopiger xanaduensis</i> SH-6                                  | 2 | 0 | 2 | 1 |
| <b>519442</b>  | <i>Halorhabdus utahensis</i> DSM 12940                             | 1 | 0 | 0 | 0 |
| <b>416348</b>  | <i>Halorubrum lacusprofundi</i> ATCC 49239                         | 0 | 0 | 1 | 1 |
| <b>543526</b>  | <i>Haloterrigena turkmenica</i> DSM 5511                           | 1 | 0 | 2 | 0 |
| <b>864073</b>  | <i>Herbaspirillum frisingense</i> GSF30                            | 1 | 0 | 1 | 0 |
| <b>204773</b>  | <i>Herminiimonas arsenicoxydans</i>                                | 1 | 0 | 2 | 0 |
| <b>316274</b>  | <i>Herpetosiphon aurantiacus</i> ATCC 23779                        | 1 | 0 | 0 | 0 |

|                |                                                                 |   |   |   |   |
|----------------|-----------------------------------------------------------------|---|---|---|---|
| <b>1226784</b> | <i>Histoplasma capsulatum</i> var. <i>capsulatum</i> Tmu        | 1 | 0 | 1 | 0 |
| <b>608538</b>  | <i>Hydrogenobacter thermophilus</i> TK-6                        | 0 | 1 | 1 | 1 |
| <b>670307</b>  | <i>Hyphomicrobium denitrificans</i> 1NES1                       | 1 | 0 | 1 | 1 |
| <b>582899</b>  | <i>Hyphomicrobium denitrificans</i> ATCC 51888                  | 1 | 0 | 1 | 1 |
| <b>283942</b>  | <i>Idiomarina loihiensis</i> L2TR                               | 1 | 0 | 1 | 0 |
| <b>945713</b>  | <i>Ignavibacterium album</i> JCM 16511                          | 0 | 0 | 0 | 1 |
| <b>946077</b>  | <i>Imtechella halotolerans</i> K1                               | 1 | 0 | 1 | 1 |
| <b>1189612</b> | <i>Indibacter alkaliphilus</i> LW1                              | 1 | 0 | 2 | 0 |
| <b>710696</b>  | <i>Intrasporangium calvum</i> DSM 43043                         | 1 | 0 | 1 | 0 |
| <b>471856</b>  | <i>Jonesia denitrificans</i> DSM 20603                          | 1 | 0 | 0 | 0 |
| <b>523791</b>  | <i>Kangiella koreensis</i> DSM 16069                            | 1 | 1 | 1 | 0 |
| <b>1184609</b> | <i>Kineosphaera limosa</i> NBRC 100340                          | 1 | 0 | 1 | 0 |
| <b>888741</b>  | <i>Kingella denitrificans</i> ATCC 33394                        | 1 | 0 | 1 | 1 |
| <b>1188007</b> | <i>Kingella kingae</i> 11220434                                 | 1 | 0 | 1 | 1 |
| <b>887327</b>  | <i>Kingella kingae</i> ATCC 23330                               | 1 | 0 | 1 | 1 |
| <b>1150867</b> | <i>Kingella kingae</i> PYKK081                                  | 1 | 0 | 1 | 1 |
| <b>629741</b>  | <i>Kingella oralis</i> ATCC 51147                               | 1 | 0 | 1 | 1 |
| <b>384765</b>  | <i>Labrenzia aggregata</i> IAM 12614                            | 0 | 1 | 1 | 1 |
| <b>887898</b>  | <i>Lautropia mirabilis</i> ATCC 51599                           | 1 | 0 | 1 | 1 |
| <b>929563</b>  | <i>Leptonema illini</i> DSM 21528                               | 0 | 1 | 1 | 1 |
| <b>355278</b>  | <i>Leptospira biflexa</i> serovar Patoc strain 'Patoc 1 (Ames)' | 1 | 0 | 1 | 1 |
| <b>1049789</b> | <i>Leptospira broomii</i> str. 5399                             | 1 | 0 | 0 | 1 |
| <b>1193011</b> | <i>Leptospira fainei</i> sv. Hurstbridge BUT 6T                 | 1 | 0 | 0 | 1 |
| <b>1049790</b> | <i>Leptospira inadai</i> sv. Lyme 10                            | 0 | 0 | 0 | 1 |
| <b>1049971</b> | <i>Leptospira licerasiae</i> str. MMD4847                       | 0 | 0 | 1 | 1 |
| <b>1193051</b> | <i>Leptospira meyeri</i> sv. Hardjo Went 5                      | 1 | 0 | 1 | 0 |
| <b>1193069</b> | <i>Leptospira wolffii</i> Khorat-H2                             | 0 | 0 | 1 | 1 |
| <b>395495</b>  | <i>Leptothrix cholodnii</i> SP-6                                | 0 | 1 | 1 | 1 |
| <b>279714</b>  | <i>Lutiella nitroferrum</i> 2002                                | 0 | 1 | 1 | 1 |
| <b>342108</b>  | <i>Magnetospirillum magneticum</i> AMB-1                        | 0 | 2 | 1 | 1 |
| <b>272627</b>  | <i>Magnetospirillum magnetotacticum</i> MS-1                    | 0 | 1 | 0 | 1 |
| <b>221988</b>  | <i>Mannheimia succiniciproducens</i> MBEL55E                    | 1 | 0 | 1 | 0 |
| <b>313603</b>  | <i>Maribacter</i> sp. HTCC2170                                  | 1 | 0 | 1 | 1 |
| <b>859350</b>  | Marine archaeal group 1 strain BD31                             | 1 | 0 | 0 | 0 |
| <b>857392</b>  | <i>Marinilabilia</i> sp. AK2                                    | 1 | 0 | 2 | 1 |
| <b>351348</b>  | <i>Marinobacter aquaeolei</i> VT8                               | 0 | 1 | 1 | 1 |
| <b>1163748</b> | <i>Marinobacter hydrocarbonoclasticus</i> str. ATCC 49840       | 0 | 1 | 2 | 1 |
| <b>490759</b>  | <i>Marinobacter</i> sp. BSs20148                                | 1 | 0 | 1 | 1 |
| <b>270374</b>  | <i>Marinobacter</i> sp. ELB17                                   | 1 | 0 | 1 | 1 |
| <b>1094979</b> | <i>Marinobacter</i> sp. Mnl7-9                                  | 0 | 0 | 0 | 1 |
| <b>314271</b>  | <i>Maritimibacter alkaliphilus</i> HTCC2654                     | 1 | 0 | 1 | 1 |
| <b>1191523</b> | <i>Melioribacter roseus</i> P3M                                 | 0 | 0 | 0 | 1 |
| <b>1107882</b> | <i>Mesorhizobium alhagi</i> CCNWXJ12-2                          | 2 | 0 | 0 | 0 |
| <b>1082933</b> | <i>Mesorhizobium amorphae</i> CCNWGS0123                        | 1 | 0 | 0 | 0 |
| <b>754035</b>  | <i>Mesorhizobium australicum</i> WSM2073                        | 1 | 0 | 0 | 0 |
| <b>765698</b>  | <i>Mesorhizobium ciceri</i> biovar <i>biserrulae</i> WSM1271    | 1 | 0 | 0 | 0 |

|                |                                                  |   |   |   |   |
|----------------|--------------------------------------------------|---|---|---|---|
| <b>536019</b>  | Mesorhizobium opportunistum WSM2075              | 1 | 0 | 0 | 0 |
| <b>266779</b>  | Mesorhizobium sp. BNC1                           | 2 | 0 | 0 | 0 |
| <b>1156937</b> | Methylacidiphilum fumarolicum SolV               | 2 | 0 | 1 | 0 |
| <b>481448</b>  | Methylacidiphilum infernorum V4                  | 1 | 0 | 1 | 0 |
| <b>426117</b>  | Methylobacterium sp. 4-46                        | 0 | 0 | 0 | 1 |
| <b>395965</b>  | Methylocella silvestris BL2                      | 1 | 0 | 1 | 0 |
| <b>622637</b>  | Methylocystis sp. ATCC 49242                     | 1 | 0 | 0 | 0 |
| <b>754476</b>  | Methylophaga sp. JAM1                            | 0 | 0 | 2 | 1 |
| <b>754477</b>  | Methylophaga sp. JAM7                            | 1 | 0 | 0 | 0 |
| <b>583345</b>  | Methylotenera mobilis JLW8                       | 1 | 0 | 1 | 0 |
| <b>1032480</b> | Microlunatus phosphovorus NM-1                   | 1 | 0 | 1 | 0 |
| <b>644283</b>  | Micromonospora aurantiaca ATCC 27029             | 1 | 0 | 0 | 0 |
| <b>648999</b>  | Micromonospora sp. L5                            | 1 | 0 | 0 | 0 |
| <b>1089455</b> | Mobilicoccus pelagius NBRC 104925                | 1 | 0 | 1 | 0 |
| <b>857581</b>  | Moraxella catarrhalis 7169                       | 1 | 0 | 1 | 0 |
| <b>1201293</b> | Moritella dasanensis ArB 0140                    | 0 | 0 | 0 | 1 |
| <b>1202962</b> | Moritella marina ATCC 15381                      | 0 | 0 | 0 | 1 |
| <b>58051</b>   | Moritella sp. PE36                               | 0 | 0 | 0 | 1 |
| <b>886377</b>  | Muricauda ruestringensis DSM 13258               | 1 | 0 | 1 | 1 |
| <b>1078013</b> | Mycobacterium avium subsp. avium Env 77          | 1 | 0 | 1 | 0 |
| <b>1122247</b> | Mycobacterium hassiacum DSM 44199                | 1 | 0 | 0 | 0 |
| <b>1232724</b> | Mycobacterium indicus pranii                     | 1 | 0 | 2 | 0 |
| <b>1138383</b> | Mycobacterium intracellulare MOTT-64             | 1 | 0 | 2 | 0 |
| <b>875328</b>  | Mycobacterium sp. JDM601                         | 1 | 0 | 1 | 0 |
| <b>278137</b>  | Mycobacterium sp. Spyr1                          | 1 | 0 | 0 | 0 |
| <b>350058</b>  | Mycobacterium vanbaalenii PYR-1                  | 1 | 0 | 0 | 0 |
| <b>1008457</b> | Myroides injenensis M09-0166                     | 1 | 0 | 1 | 1 |
| <b>883150</b>  | Myroides odoratimimus CCUG 10230                 | 1 | 0 | 1 | 0 |
| <b>883154</b>  | Myroides odoratimimus CIP 101113                 | 1 | 0 | 1 | 1 |
| <b>883155</b>  | Myroides odoratimimus CIP 103059                 | 1 | 0 | 1 | 1 |
| <b>929704</b>  | Myroides odoratus DSM 2801                       | 1 | 0 | 1 | 1 |
| <b>348780</b>  | Natronomonas pharaonis DSM 2160                  | 1 | 0 | 0 | 0 |
| <b>888742</b>  | Neisseria bacilliformis ATCC BAA-1200            | 1 | 0 | 1 | 0 |
| <b>546262</b>  | Neisseria cinerea ATCC 14685                     | 1 | 0 | 1 | 1 |
| <b>546263</b>  | Neisseria elongata subsp. glycolytica ATCC 29315 | 1 | 0 | 1 | 0 |
| <b>546264</b>  | Neisseria flavescens NRL30031/H210               | 1 | 0 | 1 | 1 |
| <b>596320</b>  | Neisseria flavescens SK114                       | 1 | 0 | 1 | 1 |
| <b>489653</b>  | Neisseria lactamica 020-06                       | 1 | 0 | 1 | 1 |
| <b>933280</b>  | Neisseria lactamica NS19                         | 1 | 0 | 1 | 1 |
| <b>997348</b>  | Neisseria macacae ATCC 33926                     | 1 | 0 | 1 | 1 |
| <b>1069618</b> | Neisseria meningitidis 92045                     | 1 | 0 | 1 | 0 |
| <b>1069616</b> | Neisseria meningitidis 98008                     | 1 | 0 | 1 | 0 |
| <b>630588</b>  | Neisseria meningitidis alpha710                  | 1 | 0 | 1 | 0 |
| <b>1123520</b> | Neisseria meningitidis DE9686                    | 1 | 0 | 1 | 0 |
| <b>768485</b>  | Neisseria meningitidis K1207                     | 1 | 0 | 1 | 0 |
| <b>122586</b>  | Neisseria meningitidis MC58                      | 1 | 0 | 1 | 0 |



|                |                                                |   |   |   |   |
|----------------|------------------------------------------------|---|---|---|---|
| <b>1079752</b> | <i>Neisseria meningitidis</i> Nm3127           | 1 | 0 | 1 | 0 |
| <b>935589</b>  | <i>Neisseria meningitidis</i> NZ-05/33         | 1 | 0 | 1 | 0 |
| <b>546266</b>  | <i>Neisseria mucosa</i> ATCC 25996             | 1 | 0 | 1 | 1 |
| <b>435832</b>  | <i>Neisseria mucosa</i> C102                   | 1 | 0 | 1 | 1 |
| <b>546267</b>  | <i>Neisseria polysaccharea</i> ATCC 43768      | 1 | 0 | 1 | 1 |
| <b>933266</b>  | <i>Neisseria sicca</i> 4320                    | 1 | 0 | 1 | 1 |
| <b>547045</b>  | <i>Neisseria sicca</i> ATCC 29256              | 1 | 0 | 1 | 1 |
| <b>665946</b>  | <i>Neisseria</i> sp. GT4A_CT1                  | 1 | 0 | 1 | 0 |
| <b>641149</b>  | <i>Neisseria</i> sp. oral taxon 014 str. F0314 | 1 | 0 | 1 | 1 |
| <b>546268</b>  | <i>Neisseria subflava</i> NJ9703               | 1 | 0 | 1 | 1 |
| <b>1051972</b> | <i>Neisseria weaveri</i> ATCC 51223            | 1 | 0 | 1 | 0 |
| <b>1051985</b> | <i>Neisseria weaveri</i> LMG 5135              | 1 | 0 | 1 | 0 |
| <b>331117</b>  | <i>Neosartorya fischeri</i> NRRL 181           | 1 | 0 | 0 | 0 |
| <b>929713</b>  | <i>Niabella soli</i> DSM 19437                 | 0 | 0 | 1 | 1 |
| <b>700598</b>  | <i>Niastella koreensis</i> GR20-10             | 0 | 0 | 0 | 1 |
| <b>749222</b>  | <i>Nitratifractor salsuginis</i> DSM 16511     | 0 | 1 | 1 | 1 |
| <b>1189611</b> | <i>Nitratireductor aquibiodomus</i> RA22       | 1 | 0 | 0 | 0 |
| <b>1231190</b> | <i>Nitratireductor indicus</i> C115            | 0 | 0 | 0 | 1 |
| <b>391937</b>  | <i>Nitratireductor pacificus</i> pht-3B        | 1 | 0 | 0 | 0 |
| <b>387092</b>  | <i>Nitratiruptor</i> sp. SB155-2               | 0 | 1 | 1 | 1 |
| <b>323097</b>  | <i>Nitrobacter hamburgensis</i> X14            | 1 | 0 | 0 | 0 |
| <b>314253</b>  | <i>Nitrobacter</i> sp. Nb-311A                 | 1 | 0 | 0 | 0 |
| <b>323098</b>  | <i>Nitrobacter winogradskyi</i> Nb-255         | 1 | 0 | 0 | 0 |
| <b>472759</b>  | <i>Nitrosococcus halophilus</i> Nc4            | 1 | 0 | 1 | 0 |
| <b>314279</b>  | <i>Nitrosococcus oceani</i> AFC27              | 1 | 0 | 0 | 0 |
| <b>323261</b>  | <i>Nitrosococcus oceani</i> ATCC 19707         | 1 | 0 | 1 | 0 |
| <b>105559</b>  | <i>Nitrosococcus watsoni</i> C-113             | 1 | 0 | 2 | 0 |
| <b>228410</b>  | <i>Nitrosomonas europaea</i> ATCC 19718        | 1 | 0 | 1 | 0 |
| <b>335283</b>  | <i>Nitrosomonas eutropha</i> C91               | 1 | 0 | 1 | 0 |
| <b>153948</b>  | <i>Nitrosomonas</i> sp. AL212                  | 1 | 0 | 1 | 0 |
| <b>261292</b>  | <i>Nitrosomonas</i> sp. Is79A3                 | 1 | 0 | 0 | 0 |
| <b>436308</b>  | <i>Nitrosopumilus maritimus</i> SCM1           | 2 | 0 | 0 | 0 |
| <b>1001994</b> | <i>Nitrosopumilus</i> sp. MY1                  | 1 | 0 | 0 | 0 |
| <b>323848</b>  | <i>Nitrospira multiformis</i> ATCC 25196       | 1 | 0 | 1 | 0 |
| <b>1206733</b> | <i>Nocardia niigatensis</i> NBRC 100131        | 1 | 0 | 1 | 0 |
| <b>196162</b>  | <i>Nocardioides</i> sp. JS614                  | 1 | 0 | 0 | 0 |
| <b>511062</b>  | <i>Oceanimonas</i> sp. GK1                     | 1 | 0 | 1 | 0 |
| <b>1231392</b> | <i>Oceaniovalibus guishaninsula</i> JLT2003    | 1 | 0 | 1 | 1 |
| <b>670487</b>  | <i>Oceanithermus profundus</i> DSM 14977       | 0 | 1 | 1 | 0 |
| <b>439375</b>  | <i>Ochrobactrum anthropi</i> ATCC 49188        | 2 | 0 | 1 | 1 |
| <b>641118</b>  | <i>Ochrobactrum intermedium</i> LMG 3301       | 1 | 0 | 1 | 0 |
| <b>391626</b>  | <i>Octadecabacter antarcticus</i> 307          | 1 | 0 | 0 | 0 |
| <b>1031710</b> | <i>Oligotropha carboxidovorans</i> OM4         | 2 | 0 | 0 | 0 |
| <b>504832</b>  | <i>Oligotropha carboxidovorans</i> OM5         | 2 | 0 | 0 | 1 |
| <b>278957</b>  | <i>Opitutaceae</i> bacterium TAV2              | 0 | 0 | 0 | 1 |
| <b>794903</b>  | <i>Opitutaceae</i> bacterium TAV5              | 0 | 0 | 0 | 1 |

|                |                                                                            |   |   |   |   |
|----------------|----------------------------------------------------------------------------|---|---|---|---|
| <b>452637</b>  | <i>Opiritatus terrae</i> PB90-1                                            | 1 | 0 | 0 | 1 |
| <b>253245</b>  | <i>Owenweeksia hongkongensis</i> DSM 17368                                 | 0 | 0 | 0 | 1 |
| <b>621372</b>  | <i>Paenibacillus</i> sp. oral taxon 786 str. D14                           | 1 | 0 | 0 | 0 |
| <b>482561</b>  | <i>Paracoccidioides brasiliensis</i> Pb03                                  | 1 | 0 | 1 | 0 |
| <b>318586</b>  | <i>Paracoccus denitrificans</i> PD1222                                     | 0 | 1 | 1 | 1 |
| <b>1051075</b> | <i>Paracoccus denitrificans</i> SD1                                        | 1 | 0 | 1 | 1 |
| <b>412597</b>  | <i>Paracoccus</i> sp. TRP                                                  | 0 | 1 | 1 | 1 |
| <b>864564</b>  | <i>Parascardovia denticolens</i> DSM 10105                                 | 1 | 0 | 0 | 0 |
| <b>641144</b>  | <i>Parascardovia denticolens</i> F0305                                     | 1 | 0 | 0 | 0 |
| <b>1193128</b> | <i>Parascardovia denticolens</i> IPLA 20019                                | 1 | 0 | 0 | 0 |
| <b>402881</b>  | <i>Parvibaculum lavamentivorans</i> DS-1                                   | 1 | 0 | 1 | 0 |
| <b>1095749</b> | <i>Pasteurella bettyae</i> CCUG 2042                                       | 1 | 0 | 0 | 0 |
| <b>1206103</b> | <i>Pedobacter arcticus</i> A12                                             | 1 | 0 | 0 | 1 |
| <b>151895</b>  | <i>Pedobacter saltans</i> DSM 12145                                        | 0 | 0 | 0 | 1 |
| <b>500485</b>  | <i>Penicillium chrysogenum</i> Wisconsin 54-1255                           | 1 | 0 | 0 | 0 |
| <b>123214</b>  | <i>Persephonella marina</i> EX-H1                                          | 0 | 1 | 1 | 1 |
| <b>383629</b>  | <i>Phaeobacter gallaeciensis</i> 2.10                                      | 1 | 0 | 1 | 0 |
| <b>1002340</b> | <i>Phaeobacter gallaeciensis</i> ANG1                                      | 1 | 0 | 1 | 1 |
| <b>391619</b>  | <i>Phaeobacter gallaeciensis</i> DSM 17395                                 | 1 | 0 | 1 | 0 |
| <b>450851</b>  | <i>Phenylobacterium zucineum</i> HLK1                                      | 1 | 0 | 1 | 0 |
| <b>1204719</b> | <i>Phocaecicola abscessus</i> CCUG 55929                                   | 0 | 0 | 0 | 1 |
| <b>314280</b>  | <i>Photobacterium profundum</i> 3TCK                                       | 0 | 0 | 1 | 1 |
| <b>298386</b>  | <i>Photobacterium profundum</i> SS9                                        | 0 | 0 | 1 | 1 |
| <b>247490</b>  | planctomycete KSU-1                                                        | 1 | 0 | 0 | 0 |
| <b>365044</b>  | <i>Polaromonas naphthalenivorans</i> CJ2                                   | 1 | 0 | 1 | 0 |
| <b>52972</b>   | <i>Polaromonas</i> sp. CF318                                               | 1 | 0 | 0 | 0 |
| <b>991905</b>  | <i>Polymorphum gilvum</i> SL003B-26A1                                      | 0 | 1 | 1 | 1 |
| <b>1144253</b> | <i>Pontibacter</i> sp. BAB1700                                             | 1 | 0 | 1 | 2 |
| <b>944557</b>  | <i>Prevotella denticola</i> CRIS 18C-A                                     | 0 | 0 | 0 | 1 |
| <b>28129</b>   | <i>Prevotella denticola</i> F0289                                          | 0 | 0 | 0 | 1 |
| <b>857291</b>  | <i>Prevotella histicola</i> F0411                                          | 0 | 0 | 0 | 1 |
| <b>688246</b>  | <i>Prevotella multisaccharivorax</i> DSM 17128                             | 0 | 0 | 0 | 1 |
| <b>702438</b>  | <i>Prevotella oulorum</i> F0390                                            | 0 | 0 | 0 | 1 |
| <b>1171373</b> | <i>Propionibacterium acidipropionici</i> ATCC 4875                         | 1 | 0 | 2 | 0 |
| <b>765117</b>  | <i>Propionibacterium acnes</i> HL002PA3                                    | 1 | 0 | 1 | 0 |
| <b>765122</b>  | <i>Propionibacterium acnes</i> HL037PA1                                    | 1 | 0 | 1 | 0 |
| <b>765101</b>  | <i>Propionibacterium acnes</i> HL050PA2                                    | 1 | 0 | 1 | 0 |
| <b>765084</b>  | <i>Propionibacterium acnes</i> HL060PA1                                    | 1 | 0 | 1 | 0 |
| <b>765114</b>  | <i>Propionibacterium acnes</i> HL063PA2                                    | 1 | 0 | 1 | 0 |
| <b>765074</b>  | <i>Propionibacterium acnes</i> HL072PA1                                    | 1 | 0 | 1 | 0 |
| <b>1051006</b> | <i>Propionibacterium acnes</i> SK182B-JCVI                                 | 1 | 0 | 1 | 0 |
| <b>1114966</b> | <i>Propionibacterium acnes</i> TypeIA2 P.acn33                             | 1 | 0 | 1 | 0 |
| <b>997355</b>  | <i>Propionibacterium avidum</i> ATCC 25577                                 | 1 | 0 | 0 | 0 |
| <b>380773</b>  | <i>Propionibacterium freudenreichii</i> subsp. <i>shermanii</i> CIP 103027 | 1 | 0 | 0 | 0 |
| <b>767029</b>  | <i>Propionibacterium propionicum</i> F0230a                                | 1 | 0 | 0 | 0 |
| <b>450748</b>  | <i>Propionibacterium</i> sp. 5_U_42AFAA                                    | 1 | 0 | 1 | 0 |

|                |                                                                       |   |   |   |   |
|----------------|-----------------------------------------------------------------------|---|---|---|---|
| <b>1005703</b> | <i>Propionibacterium</i> sp. CC003-HC2                                | 1 | 0 | 1 | 0 |
| <b>326442</b>  | <i>Pseudoalteromonas haloplanktis</i> TAC125                          | 1 | 0 | 1 | 0 |
| <b>748280</b>  | <i>Pseudogulbenkiania</i> sp. NH8B                                    | 0 | 1 | 1 | 1 |
| <b>1163393</b> | <i>Pseudomonas aeruginosa</i> ATCC 25324                              | 0 | 1 | 1 | 1 |
| <b>1211113</b> | <i>Pseudomonas aeruginosa</i> DQ8                                     | 0 | 1 | 1 | 1 |
| <b>557722</b>  | <i>Pseudomonas aeruginosa</i> LESB58                                  | 0 | 1 | 1 | 1 |
| <b>381754</b>  | <i>Pseudomonas aeruginosa</i> PA7                                     | 0 | 2 | 1 | 1 |
| <b>509633</b>  | <i>Pseudomonas aeruginosa</i> PAb1                                    | 0 | 1 | 1 | 1 |
| <b>994484</b>  | <i>Pseudomonas brassicacearum</i> subsp. <i>brassicacearum</i> NFM421 | 0 | 1 | 2 | 2 |
| <b>1037915</b> | <i>Pseudomonas chlororaphis</i> O6                                    | 1 | 0 | 1 | 0 |
| <b>1038921</b> | <i>Pseudomonas chlororaphis</i> subsp. <i>aureofaciens</i> 30-84      | 1 | 0 | 0 | 0 |
| <b>1117110</b> | <i>Pseudomonas chlororaphis</i> subsp. <i>chlororaphis</i> GP72       | 1 | 0 | 1 | 0 |
| <b>384676</b>  | <i>Pseudomonas entomophila</i> L48                                    | 1 | 0 | 0 | 0 |
| <b>1117958</b> | <i>Pseudomonas extremaustralis</i> 14-3 substr. 14-3b                 | 0 | 0 | 1 | 1 |
| <b>1231390</b> | <i>Pseudomonas fluorescens</i> BS2                                    | 0 | 1 | 1 | 0 |
| <b>1114970</b> | <i>Pseudomonas fluorescens</i> F113                                   | 0 | 1 | 2 | 2 |
| <b>1221522</b> | <i>Pseudomonas fluorescens</i> NCIMB 11764                            | 0 | 1 | 1 | 1 |
| <b>564422</b>  | <i>Pseudomonas fluorescens</i> NZ17                                   | 1 | 0 | 0 | 0 |
| <b>220664</b>  | <i>Pseudomonas fluorescens</i> Pf-5                                   | 1 | 0 | 0 | 0 |
| <b>1038922</b> | <i>Pseudomonas fluorescens</i> Q2-87                                  | 0 | 1 | 1 | 1 |
| <b>1038923</b> | <i>Pseudomonas fluorescens</i> Q8r1-96                                | 0 | 1 | 1 | 1 |
| <b>1007656</b> | <i>Pseudomonas fluorescens</i> Wayne1                                 | 2 | 0 | 0 | 0 |
| <b>746360</b>  | <i>Pseudomonas fluorescens</i> WH6                                    | 0 | 1 | 1 | 0 |
| <b>1147786</b> | <i>Pseudomonas mandelii</i> JR-1                                      | 0 | 2 | 2 | 2 |
| <b>1001585</b> | <i>Pseudomonas mendocina</i> NK-01                                    | 1 | 0 | 1 | 1 |
| <b>665948</b>  | <i>Pseudomonas</i> sp. 2_1_26                                         | 0 | 1 | 1 | 1 |
| <b>440512</b>  | <i>Pseudomonas</i> sp. Chol1                                          | 0 | 1 | 2 | 2 |
| <b>1144323</b> | <i>Pseudomonas</i> sp. GM17                                           | 1 | 0 | 1 | 0 |
| <b>1144708</b> | <i>Pseudomonas</i> sp. GM41(2012)                                     | 0 | 1 | 1 | 1 |
| <b>1144334</b> | <i>Pseudomonas</i> sp. GM60                                           | 0 | 1 | 1 | 1 |
| <b>1144338</b> | <i>Pseudomonas</i> sp. GM79                                           | 0 | 1 | 1 | 0 |
| <b>1163398</b> | <i>Pseudomonas</i> sp. HYS                                            | 0 | 1 | 1 | 0 |
| <b>1225174</b> | <i>Pseudomonas</i> sp. S5.2                                           | 1 | 0 | 1 | 1 |
| <b>1226994</b> | <i>Pseudomonas</i> sp. TX1                                            | 1 | 0 | 1 | 0 |
| <b>32042</b>   | <i>Pseudomonas stutzeri</i> ATCC 14405 = CCUG 16156                   | 0 | 1 | 2 | 1 |
| <b>96563</b>   | <i>Pseudomonas stutzeri</i> ATCC 17588 = LMG 11199                    | 0 | 1 | 2 | 1 |
| <b>1196835</b> | <i>Pseudomonas stutzeri</i> CCUG 29243                                | 1 | 1 | 2 | 1 |
| <b>1123519</b> | <i>Pseudomonas stutzeri</i> DSM 10701                                 | 1 | 1 | 2 | 1 |
| <b>996285</b>  | <i>Pseudomonas stutzeri</i> DSM 4166                                  | 0 | 1 | 1 | 1 |
| <b>1218352</b> | <i>Pseudomonas stutzeri</i> KOS6                                      | 0 | 1 | 1 | 1 |
| <b>1109445</b> | <i>Pseudomonas stutzeri</i> SDM-LAC                                   | 1 | 1 | 2 | 1 |
| <b>1210443</b> | <i>Pseudomonas stutzeri</i> T13                                       | 1 | 1 | 2 | 1 |
| <b>477228</b>  | <i>Pseudomonas stutzeri</i> TS44                                      | 0 | 1 | 2 | 2 |
| <b>911045</b>  | <i>Pseudovibrio</i> sp. FO-BEG1                                       | 0 | 1 | 2 | 1 |
| <b>1211114</b> | <i>Pseudoxanthomonas</i> sp. GW2                                      | 1 | 0 | 1 | 0 |
| <b>743721</b>  | <i>Pseudoxanthomonas suwonensis</i> strain 11-1                       | 1 | 0 | 1 | 0 |

|                |                                                     |   |   |   |   |
|----------------|-----------------------------------------------------|---|---|---|---|
| <b>1002339</b> | <i>Psychrobacter</i> sp. 1501(2011)                 | 1 | 0 | 1 | 0 |
| <b>313595</b>  | <i>Psychroflexus torquis</i> ATCC 700755            | 0 | 0 | 0 | 1 |
| <b>357804</b>  | <i>Psychromonas ingrahamii</i> 37                   | 0 | 0 | 0 | 1 |
| <b>1007105</b> | <i>Pusillimonas</i> sp. T7-7                        | 2 | 0 | 2 | 0 |
| <b>178306</b>  | <i>Pyrobaculum aerophilum</i> str. IM2              | 0 | 1 | 1 | 0 |
| <b>340102</b>  | <i>Pyrobaculum arsenaticum</i> DSM 13514            | 0 | 1 | 1 | 0 |
| <b>410359</b>  | <i>Pyrobaculum calidifontis</i> JCM 11548           | 0 | 1 | 1 | 1 |
| <b>1104324</b> | <i>Pyrobaculum</i> sp. 1860                         | 0 | 1 | 1 | 1 |
| <b>381666</b>  | <i>Ralstonia eutropha</i> H16                       | 0 | 1 | 2 | 1 |
| <b>264198</b>  | <i>Ralstonia eutropha</i> JMP134                    | 0 | 1 | 1 | 0 |
| <b>1042878</b> | <i>Ralstonia eutropha</i> N-1                       | 0 | 1 | 1 | 0 |
| <b>266264</b>  | <i>Ralstonia metallidurans</i> CH34                 | 0 | 2 | 1 | 1 |
| <b>428406</b>  | <i>Ralstonia pickettii</i> 12D                      | 1 | 0 | 1 | 1 |
| <b>267608</b>  | <i>Ralstonia solanacearum</i> GMI1000               | 1 | 0 | 1 | 1 |
| <b>564065</b>  | <i>Ralstonia solanacearum</i> MolK2                 | 1 | 0 | 1 | 0 |
| <b>859657</b>  | <i>Ralstonia solanacearum</i> PSI07                 | 1 | 0 | 1 | 0 |
| <b>658080</b>  | <i>Ralstonia</i> sp. 5_2_56FAA                      | 1 | 0 | 1 | 1 |
| <b>314283</b>  | <i>Reinekea</i> sp. MED297                          | 0 | 0 | 0 | 1 |
| <b>538025</b>  | <i>Rhizobium etli</i> 8C-3                          | 1 | 0 | 0 | 0 |
| <b>347834</b>  | <i>Rhizobium etli</i> CFN 42                        | 1 | 0 | 1 | 0 |
| <b>526947</b>  | <i>Rhizobium etli</i> GR56                          | 1 | 0 | 0 | 0 |
| <b>754764</b>  | <i>Rhizobium leguminosarum</i> bv. trifolii WSM597  | 1 | 0 | 1 | 1 |
| <b>754774</b>  | <i>Rhizobium leguminosarum</i> bv. viciae USDA 2370 | 1 | 0 | 1 | 0 |
| <b>1128399</b> | <i>Rhizobium phaseoli</i> Ch24-10                   | 1 | 0 | 1 | 0 |
| <b>1144312</b> | <i>Rhizobium</i> sp. CF122                          | 1 | 0 | 1 | 0 |
| <b>1144314</b> | <i>Rhizobium</i> sp. CF142                          | 1 | 0 | 1 | 0 |
| <b>394</b>     | <i>Rhizobium</i> sp. NGR234                         | 1 | 0 | 1 | 0 |
| <b>1163408</b> | <i>Rhodanobacter fulvus</i> Jip2                    | 3 | 0 | 3 | 1 |
| <b>1162282</b> | <i>Rhodanobacter</i> sp. 115                        | 4 | 0 | 2 | 1 |
| <b>1076650</b> | <i>Rhodanobacter</i> sp. 116-2                      | 2 | 0 | 0 | 1 |
| <b>666685</b>  | <i>Rhodanobacter</i> sp. 2APBS1                     | 2 | 0 | 3 | 1 |
| <b>1163407</b> | <i>Rhodanobacter spathiphylli</i> B39               | 1 | 0 | 2 | 1 |
| <b>1163409</b> | <i>Rhodanobacter thiooxydans</i> LCS2               | 2 | 0 | 3 | 1 |
| <b>272942</b>  | <i>Rhodobacter capsulatus</i> SB1003                | 0 | 0 | 0 | 1 |
| <b>371731</b>  | <i>Rhodobacter</i> sp. SW2                          | 0 | 1 | 1 | 0 |
| <b>349102</b>  | <i>Rhodobacter sphaeroides</i> ATCC 17025           | 1 | 0 | 1 | 1 |
| <b>557760</b>  | <i>Rhodobacter sphaeroides</i> KD131                | 1 | 0 | 1 | 1 |
| <b>992186</b>  | <i>Rhodobacter sphaeroides</i> WS8N                 | 0 | 0 | 1 | 1 |
| <b>439496</b>  | <i>Rhodobacterales bacterium</i> Y4I                | 1 | 0 | 1 | 1 |
| <b>450821</b>  | <i>Rhodococcus</i> sp. P14                          | 1 | 0 | 0 | 0 |
| <b>338969</b>  | <i>Rhodoferax ferrireducens</i> T118                | 0 | 0 | 1 | 1 |
| <b>316055</b>  | <i>Rhodopseudomonas palustris</i> BisA53            | 1 | 0 | 1 | 1 |
| <b>316056</b>  | <i>Rhodopseudomonas palustris</i> BisB18            | 0 | 0 | 0 | 1 |
| <b>258594</b>  | <i>Rhodopseudomonas palustris</i> CGA009            | 2 | 0 | 1 | 1 |
| <b>652103</b>  | <i>Rhodopseudomonas palustris</i> DX-1              | 1 | 0 | 1 | 1 |
| <b>316058</b>  | <i>Rhodopseudomonas palustris</i> HaA2              | 0 | 0 | 0 | 1 |

|                |                                               |   |   |   |   |
|----------------|-----------------------------------------------|---|---|---|---|
| <b>395960</b>  | <i>Rhodopseudomonas palustris</i> TIE-1       | 2 | 0 | 1 | 1 |
| <b>414684</b>  | <i>Rhodospirillum centenum</i> SW             | 0 | 0 | 1 | 1 |
| <b>518766</b>  | <i>Rhodothermus marinus</i> DSM 4252          | 1 | 1 | 0 | 1 |
| <b>762570</b>  | <i>Rhodothermus marinus</i> SG0.5JP17-172     | 1 | 0 | 0 | 1 |
| <b>1187851</b> | <i>Rhodovulum</i> sp. PH10                    | 1 | 0 | 0 | 0 |
| <b>1228997</b> | <i>Riemerella anatipestifer</i> RA-CH-1       | 0 | 0 | 0 | 1 |
| <b>992406</b>  | <i>Riemerella anatipestifer</i> RA-GD         | 0 | 0 | 0 | 1 |
| <b>313596</b>  | <i>Robiginitalea biformata</i> HTCC2501       | 0 | 0 | 0 | 1 |
| <b>744980</b>  | <i>Roseibium</i> sp. TrichSKD4                | 1 | 0 | 0 | 0 |
| <b>383372</b>  | <i>Roseiflexus castenholzii</i> DSM 13941     | 0 | 1 | 0 | 0 |
| <b>375451</b>  | <i>Roseobacter denitrificans</i> OCh 114      | 0 | 1 | 1 | 1 |
| <b>391595</b>  | <i>Roseobacter litoralis</i> Och 149          | 0 | 1 | 1 | 1 |
| <b>388739</b>  | <i>Roseobacter</i> sp. SK209-2-6              | 1 | 0 | 1 | 1 |
| <b>314264</b>  | <i>Roseovarius</i> sp. 217                    | 1 | 0 | 1 | 1 |
| <b>391613</b>  | <i>Roseovarius</i> sp. TM1035                 | 0 | 0 | 0 | 1 |
| <b>1125724</b> | <i>Rothia aerea</i> F0474                     | 1 | 0 | 1 | 0 |
| <b>762948</b>  | <i>Rothia dentocariosa</i> ATCC 17931         | 1 | 0 | 1 | 0 |
| <b>563032</b>  | <i>Rothia dentocariosa</i> M567               | 1 | 0 | 1 | 0 |
| <b>680646</b>  | <i>Rothia mucilaginosa</i>                    | 1 | 0 | 1 | 0 |
| <b>553201</b>  | <i>Rothia mucilaginosa</i> ATCC 25296         | 1 | 0 | 1 | 0 |
| <b>563033</b>  | <i>Rothia mucilaginosa</i> M508               | 1 | 0 | 1 | 0 |
| <b>987059</b>  | <i>Rubrivivax benzoatilyticus</i> JA2         | 0 | 1 | 1 | 0 |
| <b>1154769</b> | <i>Rubrivivax gelatinosus</i> CBS             | 0 | 1 | 1 | 1 |
| <b>983917</b>  | <i>Rubrivivax gelatinosus</i> IL144           | 0 | 1 | 1 | 1 |
| <b>246200</b>  | <i>Ruegeria pomeroyi</i> DSS-3                | 0 | 1 | 1 | 1 |
| <b>981384</b>  | <i>Ruegeria</i> sp. TW15                      | 0 | 1 | 1 | 1 |
| <b>761193</b>  | <i>Runella slithyformis</i> DSM 19594         | 0 | 0 | 0 | 1 |
| <b>882083</b>  | <i>Saccharomonospora marina</i> XMU15         | 1 | 0 | 0 | 0 |
| <b>309807</b>  | <i>Salinibacter ruber</i> DSM 13855           | 0 | 0 | 0 | 1 |
| <b>146919</b>  | <i>Salinibacter ruber</i> M8                  | 0 | 0 | 0 | 1 |
| <b>1033802</b> | <i>Salinisphaera shabanensis</i> E1L3A        | 1 | 0 | 1 | 1 |
| <b>1095772</b> | <i>Sanguibacter</i> sp. JC301                 | 1 | 0 | 0 | 0 |
| <b>641146</b>  | <i>Scardovia inopinata</i> F0304              | 1 | 0 | 0 | 0 |
| <b>857290</b>  | <i>Scardovia wiggisiae</i> F0424              | 2 | 0 | 0 | 0 |
| <b>1043205</b> | <i>Serinicoccus marinus</i> MCCC 1A05965      | 1 | 0 | 0 | 0 |
| <b>326297</b>  | <i>Shewanella amazonensis</i> SB2B            | 1 | 0 | 1 | 0 |
| <b>318161</b>  | <i>Shewanella denitrificans</i> OS217         | 1 | 0 | 1 | 1 |
| <b>323850</b>  | <i>Shewanella loihica</i> PV-4                | 1 | 0 | 1 | 1 |
| <b>392500</b>  | <i>Shewanella woodyi</i> ATCC 51908           | 1 | 0 | 1 | 0 |
| <b>580332</b>  | <i>Sideroxydans lithotrophicus</i> ES-1       | 0 | 1 | 1 | 0 |
| <b>644107</b>  | <i>Silicibacter lacuscaerulensis</i> ITI-1157 | 0 | 1 | 1 | 1 |
| <b>644076</b>  | <i>Silicibacter</i> sp. TrichCH4B             | 1 | 0 | 1 | 0 |
| <b>641147</b>  | <i>Simonsiella muelleri</i> ATCC 29453        | 1 | 0 | 1 | 1 |
| <b>1128329</b> | <i>Sinorhizobium fredii</i> CCBAU 05557       | 1 | 0 | 1 | 0 |
| <b>1128330</b> | <i>Sinorhizobium fredii</i> CCBAU 25509       | 1 | 0 | 1 | 0 |
| <b>1117943</b> | <i>Sinorhizobium fredii</i> HH103             | 1 | 0 | 1 | 0 |

|                |                                                |   |   |   |   |
|----------------|------------------------------------------------|---|---|---|---|
| <b>1185652</b> | <i>Sinorhizobium fredii</i> USDA 257           | 1 | 0 | 1 | 1 |
| <b>366394</b>  | <i>Sinorhizobium medicae</i> WSM419            | 1 | 0 | 1 | 0 |
| <b>266834</b>  | <i>Sinorhizobium meliloti</i> 1021             | 1 | 0 | 1 | 1 |
| <b>794846</b>  | <i>Sinorhizobium</i> sp. CCBAU 05631           | 1 | 0 | 1 | 0 |
| <b>929556</b>  | <i>Solitalea canadensis</i> DSM 3403           | 1 | 0 | 1 | 1 |
| <b>479434</b>  | <i>Sphaerobacter thermophilus</i> DSM 20745    | 1 | 0 | 0 | 1 |
| <b>392499</b>  | <i>Sphingomonas wittichii</i> RW1              | 1 | 0 | 2 | 0 |
| <b>639283</b>  | <i>Starkeya novella</i> DSM 506                | 1 | 0 | 1 | 0 |
| <b>996637</b>  | <i>Streptomyces griseoaurantiacus</i> M045     | 1 | 0 | 0 | 0 |
| <b>1038929</b> | <i>Streptomyces xinghaiensis</i> S187          | 1 | 0 | 1 | 0 |
| <b>479432</b>  | <i>Streptosporangium roseum</i> DSM 43021      | 1 | 0 | 0 | 0 |
| <b>679936</b>  | <i>Sulfobacillus acidophilus</i> DSM 10332     | 1 | 0 | 0 | 0 |
| <b>1051632</b> | <i>Sulfobacillus acidophilus</i> TPY           | 1 | 0 | 0 | 0 |
| <b>1163617</b> | <i>Sulfuricella denitrificans</i> skB26        | 0 | 2 | 1 | 1 |
| <b>563040</b>  | <i>Sulfurimonas autotrophica</i> DSM 16294     | 0 | 1 | 2 | 1 |
| <b>326298</b>  | <i>Sulfurimonas denitrificans</i> DSM 1251     | 0 | 1 | 1 | 2 |
| <b>929558</b>  | <i>Sulfurimonas</i> sp. GD1                    | 0 | 1 | 1 | 1 |
| <b>387093</b>  | <i>Sulfurovum</i> sp. NBC37-1                  | 0 | 1 | 1 | 1 |
| <b>292459</b>  | <i>Symbiobacterium thermophilum</i> IAM 14863  | 1 | 0 | 0 | 0 |
| <b>1008459</b> | <i>Taylorella asinigenitalis</i> MCE3          | 1 | 0 | 0 | 0 |
| <b>743973</b>  | <i>Taylorella equigenitalis</i> ATCC 35865     | 1 | 0 | 0 | 0 |
| <b>937774</b>  | <i>Taylorella equigenitalis</i> MCE9           | 1 | 0 | 0 | 0 |
| <b>1123366</b> | <i>Thalassospira xiamenensis</i> M-5 DSM 17429 | 0 | 1 | 1 | 1 |
| <b>1234381</b> | <i>Thauera aminoaromatica</i> S2               | 0 | 1 | 1 | 1 |
| <b>1123367</b> | <i>Thauera linaloolentis</i> 47Lol = DSM 12138 | 0 | 1 | 1 | 2 |
| <b>1234382</b> | <i>Thauera phenylacetica</i> B4P               | 0 | 2 | 1 | 1 |
| <b>905052</b>  | <i>Thauera selenatis</i> AX                    | 0 | 1 | 1 | 1 |
| <b>305700</b>  | <i>Thauera</i> sp. 27                          | 0 | 2 | 1 | 1 |
| <b>303682</b>  | <i>Thauera</i> sp. 28                          | 0 | 2 | 1 | 1 |
| <b>497321</b>  | <i>Thauera</i> sp. 63                          | 0 | 2 | 1 | 1 |
| <b>85643</b>   | <i>Thauera</i> sp. MZ1T                        | 0 | 1 | 1 | 1 |
| <b>644966</b>  | <i>Thermaerobacter marianensis</i> DSM 12885   | 1 | 0 | 0 | 0 |
| <b>867903</b>  | <i>Thermaerobacter subterraneus</i> DSM 13965  | 1 | 0 | 0 | 0 |
| <b>525904</b>  | <i>Thermobaculum terrenum</i> ATCC BAA-798     | 1 | 0 | 0 | 0 |
| <b>269800</b>  | <i>Thermobifida fusca</i> YX                   | 1 | 0 | 0 | 0 |
| <b>469371</b>  | <i>Thermobispora bispora</i> DSM 43833         | 1 | 0 | 0 | 0 |
| <b>309801</b>  | <i>Thermomicrobium roseum</i> DSM 5159         | 0 | 0 | 0 | 1 |
| <b>751945</b>  | <i>Thermus oshimai</i> JL-2                    | 1 | 1 | 1 | 0 |
| <b>743525</b>  | <i>Thermus scotoductus</i> SA-01               | 1 | 1 | 1 | 0 |
| <b>798128</b>  | <i>Thermus thermophilus</i> JL-18              | 0 | 1 | 1 | 0 |
| <b>762633</b>  | <i>Thermus thermophilus</i> SG0.5JP17-16       | 0 | 1 | 1 | 0 |
| <b>396595</b>  | <i>Thioalkalivibrio</i> sp. K90mix             | 2 | 0 | 0 | 0 |
| <b>713587</b>  | <i>Thioalkalivibrio thiocyanoxidans</i> ARh 4  | 0 | 0 | 1 | 1 |
| <b>292415</b>  | <i>Thiobacillus denitrificans</i> ATCC 25259   | 0 | 1 | 2 | 1 |
| <b>768671</b>  | <i>Thiocapsa marina</i>                        | 0 | 0 | 1 | 1 |
| <b>559882</b>  | <i>Trichophyton equinum</i> CBS127.97          | 1 | 0 | 0 | 0 |

|                |                                                 |   |   |   |   |
|----------------|-------------------------------------------------|---|---|---|---|
| <b>34387</b>   | <i>Trichophyton tonsurans</i> CBS 112818        | 1 | 0 | 1 | 0 |
| <b>663202</b>  | <i>Trichophyton verrucosum</i> HKI 0517         | 1 | 0 | 1 | 0 |
| <b>869212</b>  | <i>Turneriella parva</i> DSM 21527              | 1 | 0 | 0 | 0 |
| <b>336963</b>  | <i>Uncinocarpus reesii</i> 1704                 | 1 | 0 | 1 | 0 |
| <b>1089683</b> | uncultured marine crenarchaeote 'Gulf of Maine' | 3 | 0 | 0 | 0 |
| <b>655186</b>  | uncultured SUP05 cluster bacterium              | 1 | 0 | 1 | 0 |
| <b>675816</b>  | <i>Vibrio orientalis</i> CIP 102891             | 0 | 0 | 0 | 1 |
| <b>1051646</b> | <i>Vibrio tubiashii</i> ATCC 19109              | 0 | 0 | 0 | 1 |
| <b>866909</b>  | <i>Vibrio tubiashii</i> NCIMB 1337              | 0 | 0 | 0 | 1 |
| <b>1196028</b> | <i>Virgibacillus halodenitrificans</i> 1806     | 1 | 0 | 0 | 0 |
| <b>273121</b>  | <i>Wolinella succinogenes</i> DSM 1740          | 0 | 0 | 0 | 1 |
| <b>446471</b>  | <i>Xylanimonas cellulosilytica</i> DSM 15894    | 1 | 0 | 0 | 0 |
| <b>63186</b>   | <i>Zobellia galactanivorans</i>                 | 0 | 0 | 1 | 1 |

---
