# Supplementary material for: Intergenomic Comparisons Highlight Modularity of the Denitrification Pathway and Underpin the Importance of Community Structure for N2O Emissions
Source: PubMed Central journal article supplement (PMC4250227; doi:10.1371/journal.pone.0114118), 2014-12-01
Supplement: pone.0114118.s007.pdf [file pone.0114118.s007.pdf]

**Table S2.** Frequency table of gene co-occurrence patterns and taxonomic affiliation at class level. The *nirK* (K), *nirS* (S) and *nosZ* (Z) co-occurrence types and percentage of organisms within each class that also harbor a *nor* gene are indicated.

|                       | <b>K</b> | <b>%nor</b> | <b>KS</b> | <b>%nor</b> | <b>KSZ</b> | <b>%nor</b> | <b>KZ</b> | <b>%nor</b> | <b>S</b> | <b>%nor</b> | <b>SZ</b> | <b>%nor</b> | <b>Z</b> | <b>%nor</b> |
|-----------------------|----------|-------------|-----------|-------------|------------|-------------|-----------|-------------|----------|-------------|-----------|-------------|----------|-------------|
| Acidimicrobiia        | 1        | 0           | 0         | -           | 0          | -           | 0         | -           | 0        | -           | 0         | -           | 0        | -           |
| Actinobacteria        | 101      | 43          | 0         | -           | 0          | -           | 0         | -           | 0        | -           | 0         | -           | 0        | -           |
| Alphaproteobacteria   | 54       | 59          | 0         | -           | 0          | -           | 45        | 98          | 1        | 100         | 14        | 93          | 13       | 31          |
| Anaerolineae          | 0        | -           | 0         | -           | 0          | -           | 0         | -           | 1        | 0           | 0         | -           | 0        | -           |
| Aquificae             | 0        | -           | 0         | -           | 0          | -           | 0         | -           | 0        | -           | 2         | 100         | 0        | -           |
| Archaeoglobi          | 0        | -           | 0         | -           | 0          | -           | 0         | -           | 0        | -           | 0         | -           | 1        | 100         |
| Bacilli               | 11       | 36          | 0         | -           | 0          | -           | 4         | 100         | 0        | -           | 1         | 100         | 1        | 0           |
| Bacteroidia           | 0        | -           | 0         | -           | 0          | -           | 1         | 100         | 0        | -           | 0         | -           | 6        | 0           |
| Betaproteobacteria    | 35       | 86          | 1         | 100         | 0          | -           | 34        | 100         | 7        | 86          | 28        | 100         | 3        | 100         |
| Caldilineae           | 0        | -           | 0         | -           | 0          | -           | 0         | -           | 0        | -           | 0         | -           | 1        | -           |
| Chloroflexi           | 4        | 0           | 0         | -           | 0          | -           | 0         | -           | 1        | 0           | 0         | -           | 0        | -           |
| Clostridia            | 5        | 0           | 0         | -           | 0          | -           | 0         | -           | 0        | -           | 0         | -           | 7        | 86          |
| Cytophagia            | 1        | 100         | 0         | -           | 0          | -           | 4         | 75          | 0        | -           | 0         | -           | 2        | 0           |
| Deferribacteres       | 0        | -           | 0         | -           | 0          | -           | 0         | -           | 0        | -           | 0         | -           | 1        | 0           |
| Deinococci            | 0        | -           | 2         | 100         | 0          | -           | 0         | -           | 3        | 100         | 0         | -           | 0        | -           |
| Deltaproteobacteria   | 2        | 100         | 0         | -           | 0          | -           | 0         | -           | 0        | -           | 0         | -           | 5        | 100         |
| Epsilonproteobacteria | 0        | -           | 0         | -           | 0          | -           | 0         | -           | 0        | -           | 6         | 100         | 10       | 60          |
| Eurotiomycetes        | 22       | 59          | 0         | -           | 0          | -           | 0         | -           | 0        | -           | 0         | -           | 0        | -           |
| Flavobacteria         | 7        | 100         | 0         | -           | 0          | -           | 16        | 69          | 0        | -           | 0         | -           | 10       | 20          |
| Gammaproteobacteria   | 44       | 57          | 1         | 100         | 5          | 100         | 17        | 94          | 4        | 100         | 26        | 100         | 16       | 37          |
| Gemmatimonadetes      | 0        | -           | 0         | -           | 0          | -           | 1         | 0           | 0        | -           | 0         | -           | 0        | -           |
| Halobacteria          | 5        | 60          | 0         | -           | 0          | -           | 4         | 100         | 0        | -           | 0         | -           | 4        | 100         |
| Ignavibacteria        | 0        | -           | 0         | -           | 0          | -           | 0         | -           | 0        | -           | 0         | -           | 2        | 0           |
| Marine Group I        | 8        | 0           | 0         | -           | 0          | -           | 0         | -           | 0        | -           | 0         | -           | 0        | -           |
| Nitrospira            | 1        | 0           | 0         | -           | 0          | -           | 0         | -           | 1        | 100         | 0         | -           | 0        | -           |

|                           |   |     |   |   |   |   |   |    |   |     |   |     |   |    |
|---------------------------|---|-----|---|---|---|---|---|----|---|-----|---|-----|---|----|
| Opitutae                  | 0 | -   | 0 | - | 0 | - | 1 | 0  | 0 | -   | 0 | -   | 2 | 0  |
| Planctomycetacia          | 1 | 0   | 0 | - | 0 | - | 0 | -  | 0 | -   | 0 | -   | 0 | -  |
| Soil Crenarchaeotic Group | 1 | 0   | 0 | - | 0 | - | 0 | -  | 0 | -   | 0 | -   | 0 | -  |
| Sordariomycetes           | 5 | 100 | 0 | - | 0 | - | 0 | -  | 0 | -   | 0 | -   | 0 | -  |
| Spartobacteria            | 1 | 0   | 0 | - | 0 | - | 0 | -  | 0 | -   | 0 | -   | 0 | -  |
| Sphingobacteria           | 0 | -   | 0 | - | 1 | 0 | 1 | 0  | 0 | -   | 0 | -   | 2 | 0  |
| Sphingobacteriia          | 0 | -   | 0 | - | 0 | - | 2 | 50 | 0 | -   | 0 | -   | 4 | 50 |
| Spirochaetes              | 2 | 50  | 0 | - | 0 | - | 3 | 33 | 0 | -   | 1 | 100 | 3 | 67 |
| Thermomicrobia            | 1 | 0   | 0 | - | 0 | - | 1 | 0  | 0 | -   | 0 | -   | 1 | 0  |
| Thermoprotei              | 0 | -   | 0 | - | 0 | - | 0 | -  | 2 | 100 | 2 | 100 | 0 | -  |
| unclassified              | 2 | 100 | 0 | - | 0 | - | 0 | -  | 0 | -   | 0 | -   | 0 | -  |

The residuals are according to Pearson's Chi-squared test ( $P < 0.001$ ). Combinations with Pearson residuals  $> 2$  are highlighted in blue, whereas combinations with Pearson residuals  $< -2$  are highlighted in red.
