# Supplementary material for: Intergenomic Comparisons Highlight Modularity of the Denitrification Pathway and Underpin the Importance of Community Structure for N2O Emissions
Source: PubMed Central journal article supplement (PMC4250227; doi:10.1371/journal.pone.0114118), 2014-12-01
Supplement: pone.0114118.s008.pdf [file pone.0114118.s008.pdf]

**Table S3.** Frequency table of gene co-occurrence patterns and taxonomic affiliation at order level. The *nirK* (K), *nirS* (S) and *nosZ* (Z) co-occurrence types and percentage of organisms within each order that also harbor a *nor* gene are indicated.

|                    | <b>K</b> | <b>%nor</b> | <b>KS</b> | <b>%nor</b> | <b>KSZ</b> | <b>%nor</b> | <b>KZ</b> | <b>%nor</b> | <b>S</b> | <b>%nor</b> | <b>SZ</b> | <b>%nor</b> | <b>Z</b> | <b>%nor</b> |
|--------------------|----------|-------------|-----------|-------------|------------|-------------|-----------|-------------|----------|-------------|-----------|-------------|----------|-------------|
| Acidimicrobiales   | 1        | 0           | 0         | -           | 0          | -           | 0         | -           | 0        | -           | 0         | -           | 0        | -           |
| Actinomycetales    | 28       | 50          | 0         | -           | 0          | -           | 0         | -           | 0        | -           | 0         | -           | 0        | -           |
| Aeromonadales      | 1        | 100         | 0         | -           | 0          | -           | 0         | -           | 0        | -           | 0         | -           | 1        | 0           |
| Alteromonadales    | 5        | 100         | 0         | -           | 0          | -           | 4         | 100         | 0        | -           | 3         | 67          | 5        | 0           |
| Anaerolineales     | 0        | -           | 0         | -           | 0          | -           | 0         | -           | 1        | 0           | 0         | -           | 0        | -           |
| Aquificales        | 0        | -           | 0         | -           | 0          | -           | 0         | -           | 0        | -           | 2         | 100         | 0        | -           |
| Archaeoglobales    | 0        | -           | 0         | -           | 0          | -           | 0         | -           | 0        | -           | 0         | -           | 1        | 100         |
| Bacillales         | 11       | 37          | 0         | -           | 0          | -           | 4         | 100         | 0        | -           | 0         | -           | 1        | 0           |
| Bacteroidales      | 0        | -           | 0         | -           | 0          | -           | 1         | 100         | 0        | -           | 0         | -           | 6        | 0           |
| Bdellovibrionales  | 2        | 100         | 0         | -           | 0          | -           | 0         | -           | 0        | -           | 0         | -           | 1        | 100         |
| Bifidobacteriales  | 6        | 0           | 0         | -           | 0          | -           | 0         | -           | 0        | -           | 0         | -           | 0        | -           |
| Brocadiales        | 1        | 0           | 0         | -           | 0          | -           | 0         | -           | 0        | -           | 0         | -           | 0        | -           |
| Burkholderiales    | 15       | 73          | 1         | 100         | 0          | -           | 15        | 100         | 6        | 83          | 13        | 100         | 2        | 100         |
| Caldilineales      | 0        | -           | 0         | -           | 0          | -           | 0         | -           | 0        | -           | 0         | -           | 1        | 0           |
| Campylobacteriales | 0        | -           | 0         | -           | 0          | -           | 0         | -           | 0        | -           | 4         | 100         | 10       | 60          |
| Cardiobacteriales  | 0        | -           | 0         | -           | 0          | -           | 2         | 100         | 0        | -           | 0         | -           | 0        | -           |
| Caulobacterales    | 3        | 67          | 0         | -           | 0          | -           | 0         | -           | 0        | -           | 0         | -           | 0        | -           |
| Chloroflexales     | 3        | 0           | 0         | -           | 0          | -           | 0         | -           | 1        | 0           | 0         | -           | 0        | -           |
| Chromatiales       | 5        | 60          | 0         | -           | 0          | -           | 0         | -           | 0        | -           | 0         | -           | 3        | 100         |
| Chthoniobacterales | 1        | 0           | 0         | -           | 0          | -           | 0         | -           | 0        | -           | 0         | -           | 0        | -           |
| Clostridiales      | 5        | 0           | 0         | -           | 0          | -           | 0         | -           | 0        | -           | 0         | -           | 7        | 86          |
| Corynebacteriales  | 22       | 41          | 0         | -           | 0          | -           | 0         | -           | 0        | -           | 0         | -           | 0        | -           |
| Cytophagales       | 1        | 100         | 0         | -           | 0          | -           | 4         | 75          | 0        | -           | 0         | -           | 2        | 0           |
| Deferribacteriales | 0        | -           | 0         | -           | 0          | -           | 0         | -           | 0        | -           | 0         | -           | 1        | 0           |
| Eurotiales         | 6        | 67          | 0         | -           | 0          | -           | 0         | -           | 0        | -           | 0         | -           | 0        | -           |

|                     |    |     |   |     |   |     |    |     |   |     |    |     |    |     |
|---------------------|----|-----|---|-----|---|-----|----|-----|---|-----|----|-----|----|-----|
| Flavobacteriales    | 7  | 100 | 0 | -   | 0 | -   | 16 | 69  | 0 | -   | 0  | -   | 10 | 20  |
| Frankiales          | 2  | 0   | 0 | -   | 0 | -   | 0  | -   | 0 | -   | 0  | -   | 0  | -   |
| Gemmatimonadales    | 0  | -   | 0 | -   | 0 | -   | 1  | 0   | 0 | -   | 0  | -   | 0  | -   |
| Halobacteriales     | 5  | 60  | 0 | -   | 0 | -   | 4  | 100 | 0 | -   | 0  | -   | 4  | 50  |
| Herpetosiphonales   | 1  | 0   | 0 | -   | 0 | -   | 0  | -   | 0 | -   | 0  | -   | 0  | -   |
| Hydrogenophilales   | 0  | -   | 0 | -   | 0 | -   | 0  | -   | 0 | -   | 1  | 100 | 0  | -   |
| Ignavibacteriales   | 0  | -   | 0 | -   | 0 | -   | 0  | -   | 0 | -   | 0  | -   | 2  | 0   |
| Lactobacillales     | 0  | -   | 0 | -   | 0 | -   | 0  | -   | 0 | -   | 1  | 100 | 0  | -   |
| Methylococcales     | 0  | -   | 0 | -   | 1 | 100 | 0  | -   | 0 | -   | 0  | -   | 0  | -   |
| Methylophilales     | 1  | 100 | 0 | -   | 0 | -   | 0  | -   | 0 | -   | 0  | -   | 0  | -   |
| Micrococcales       | 16 | 44  | 0 | -   | 0 | -   | 0  | -   | 0 | -   | 0  | -   | 0  | -   |
| Micromonosporales   | 4  | 0   | 0 | -   | 0 | -   | 0  | -   | 0 | -   | 0  | -   | 0  | -   |
| Myxococcales        | 0  | -   | 0 | -   | 0 | -   | 0  | -   | 0 | -   | 0  | -   | 4  | 100 |
| Nautiliales         | 0  | -   | 0 | -   | 0 | -   | 0  | -   | 0 | -   | 2  | 100 | 0  | -   |
| Neisseriales        | 14 | 100 | 0 | -   | 0 | -   | 19 | 100 | 0 | -   | 2  | 100 | 0  | -   |
| Nitrosomonadales    | 5  | 80  | 0 | -   | 0 | -   | 0  | -   | 1 | 100 | 0  | -   | 0  | -   |
| Nitrospirales       | 1  | 0   | 0 | -   | 0 | -   | 0  | -   | 1 | 100 | 0  | -   | 0  | -   |
| Oceanospirillales   | 1  | 100 | 1 | 100 | 0 | -   | 1  | 100 | 0 | -   | 1  | 100 | 1  | 0   |
| Onygenales          | 15 | 53  | 0 | -   | 0 | -   | 0  | -   | 0 | -   | 0  | -   | 0  | -   |
| Opitutales          | 0  | -   | 0 | -   | 0 | -   | 1  | 0   | 0 | -   | 0  | -   | 2  | 0   |
| Pasteurellales      | 17 | 41  | 0 | -   | 0 | -   | 0  | -   | 0 | -   | 0  | -   | 0  | -   |
| Propionibacteriales | 16 | 75  | 0 | -   | 0 | -   | 0  | -   | 0 | -   | 0  | -   | 0  | -   |
| Pseudomonadales     | 11 | 54  | 0 | -   | 4 | 100 | 2  | 100 | 4 | 100 | 20 | 100 | 1  | 100 |
| Pseudonocardiales   | 2  | 0   | 0 | -   | 0 | -   | 0  | -   | 0 | -   | 0  | -   | 0  | -   |
| Rhizobiales         | 44 | 57  | 0 | -   | 0 | -   | 33 | 97  | 0 | -   | 1  | 0   | 6  | 17  |
| Rhodobacteriales    | 5  | 60  | 0 | -   | 0 | -   | 10 | 100 | 1 | 100 | 11 | 100 | 5  | 40  |
| Rhodocyclales       | 0  | -   | 0 | -   | 0 | -   | 0  | -   | 0 | -   | 12 | 100 | 1  | 100 |
| Rhodospirillales    | 1  | 100 | 0 | -   | 0 | -   | 2  | 100 | 0 | -   | 2  | 100 | 2  | 50  |
| Salinisphaerales    | 0  | -   | 0 | -   | 0 | -   | 1  | 100 | 0 | -   | 0  | -   | 0  | -   |
| Sphaerobacteriales  | 1  | 0   | 0 | -   | 0 | -   | 0  | -   | 0 | -   | 0  | -   | 0  | -   |

|                     |    |     |   |     |   |   |   |    |   |     |   |     |   |     |
|---------------------|----|-----|---|-----|---|---|---|----|---|-----|---|-----|---|-----|
| Sphaerobacteridae   | 0  | -   | 0 | -   | 0 | - | 1 | 0  | 0 | -   | 0 | -   | 0 | -   |
| Sphingobacteriales  | 0  | -   | 0 | -   | 1 | 0 | 3 | 33 | 0 | -   | 0 | -   | 6 | 33  |
| Sphingomonadales    | 1  | 100 | 0 | -   | 0 | - | 0 | -  | 0 | -   | 0 | -   | 0 | -   |
| Spirochaetales      | 2  | 50  | 0 | -   | 0 | - | 3 | 33 | 0 | -   | 1 | 100 | 3 | 67  |
| Streptomycetales    | 2  | 50  | 0 | -   | 0 | - | 0 | -  | 0 | -   | 0 | -   | 0 | -   |
| Streptosporangiales | 3  | 0   | 0 | -   | 0 | - | 0 | -  | 0 | -   | 0 | -   | 0 | -   |
| Thermales           | 0  | -   | 2 | 100 | 0 | - | 0 | -  | 3 | 100 | 0 | -   | 0 | -   |
| Thermomicrobiales   | 0  | -   | 0 | -   | 0 | - | 0 | -  | 0 | -   | 0 | -   | 1 | 0   |
| Thermoproteales     | 0  | -   | 0 | -   | 0 | - | 0 | -  | 2 | 100 | 2 | 100 | 0 | -   |
| Thiotrichales       | 1  | 0   | 0 | -   | 0 | - | 0 | -  | 0 | -   | 0 | -   | 1 | 100 |
| unclassified        | 17 | 47  | 0 | -   | 0 | - | 0 | -  | 0 | -   | 1 | 100 | 0 | -   |
| Vibrionales         | 0  | -   | 0 | -   | 0 | - | 0 | -  | 0 | -   | 1 | 100 | 4 | 25  |
| Xanthomonadales     | 3  | 67  | 0 | -   | 0 | - | 7 | 86 | 0 | -   | 0 | -   | 0 | -   |

The residuals are according to Pearson's Chi-squared test ( $P < 0.001$ ). Combinations with Pearson residuals  $> 2$  are highlighted in blue, whereas combinations with Pearson residuals  $< -2$  are highlighted in red.
